# Supplementary material
Source: publisher figshare collection journal article supplement (https://gsajournals.figshare.com/ndownloader/files/25817276)
Supplement: Supplementary file 1 [file 25817276]

## Sheet: MAGeCK enriched gene 
Gene	Enriched sgRNA	Enriched Rank	Enriched P-Value	LFC	Z-Score Untreated	Z-Score Treated	Z-Ratio
CCDC101	4	1	0.0004	8.85	0.7426	8.2232	11.1863
TAF6L	4	2	0.0004	8.52	1.0613	8.251	10.7514
SUPT20H	4	3	0.0004	8.38	1.3829	8.4355	10.5463
TADA2B	4	4	0.0004	8.74	1.1167	8.4874	11.0221
NF2	4	5	0.0004	5.23	3.1405	7.4248	6.4067
MED12	3	6	0.0004	8.98	1.2531	8.8325	11.3341
TADA3	4	7	0.0004	9.04	2.2581	9.8456	11.3463
CUL3	4	8	0.0004	7.87	1.6568	8.2627	9.8783
TADA1	3	9	0.0004	7.73	-0.4322	6.1374	9.824
MED23	4	10	0.0004	4.6	0.8013	4.633	5.7299
NF1	3	11	0.0004	4.93	-1.4365	2.7615	6.2775
TAF5L	3	12	0.0011	8.47	1.4351	8.5628	10.6586
MED15	4	13	0.0011	3.72	1.1437	4.2028	4.5744
GFM1	4	14	0.0016	4.22	-1.2905	2.2932	5.3589
AHR	4	15	0.0016	2.52	0.0893	2.1581	3.0935
MED19	3	16	0.0034	6.31	-0.7702	4.5931	8.0203
ANAPC11	4	17	0.0038	2	-1.3184	0.3578	2.5066
HIRA	4	18	0.0118	1.84	-0.2044	1.2959	2.2435
MAU2	4	19	0.0169	1.42	0.3403	1.4605	1.6751
MARS2	3	20	0.0205	3.52	-2.5021	0.5261	4.5283
MED10	3	21	0.0252	3.15	-0.1639	2.4591	3.9224
PGD	4	22	0.0396	2.22	-1.4778	0.396	2.802
VBP1	4	23	0.0396	1.36	0.0679	1.1461	1.6123
C7orf26	4	24	0.0443	1.97	-0.9084	0.7322	2.4533
POLR3K	3	25	0.0466	2.39	-1.9225	0.1109	3.0407
FOXD3	4	26	0.0466	1.48	1.2983	2.427	1.6877
CAND1	4	27	0.0466	2.41	0.9297	2.8765	2.9112
PELO	4	28	0.0466	2.02	-1.1223	0.5707	2.5316
CYP2R1	3	29	0.0466	1.91	1.9351	3.4118	2.2082
SMARCA4	4	30	0.0466	3.03	0.187	2.6934	3.7479
CTC1	4	31	0.0466	2.29	-1.4996	0.4377	2.8969
CYC1	3	32	0.0466	2.61	-2.3698	-0.1256	3.356
MRPS12	4	33	0.0473	1.84	-0.5229	0.9925	2.2661
CYLD	4	34	0.0529	3.55	1.2589	4.1662	4.3474
GLMN	4	35	0.0731	1.94	-0.4584	1.1338	2.3809
FLYWCH1	4	36	0.0952	4.04	1.0191	4.3589	4.9942
SNRNP25	3	37	0.0952	2.57	-2.551	-0.3338	3.3156
MED24	3	38	0.0952	4.82	0.6846	4.7052	6.0122
SDSL	2	39	0.0991	3	1.4955	3.9238	3.6312
METTL3	4	40	0.0991	1.5	0.1934	1.387	1.7849
ALDOA	3	41	0.1095	1.84	-0.5908	0.9263	2.2688
SNRNP35	3	42	0.1095	1.52	-0.239	0.9897	1.8375
BCS1L	4	43	0.1095	2.09	-1.821	-0.0419	2.6603
EXOSC4	3	44	0.1095	2.33	-1.7674	0.2139	2.9627
CCNC	2	45	0.1136	5.06	-2.6864	1.6763	6.5239
RBM6	1	46	0.1198	9.02	2.0809	9.6621	11.3368
COX10	4	47	0.1243	0.93	0.8659	1.5394	1.0071
WDR18	4	48	0.1243	1.89	-1.0039	0.5713	2.3556
RANBP1	4	49	0.1306	1.87	-1.384	0.1894	2.3529
MRPS25	4	50	0.1393	1.96	-1.2981	0.3458	2.4583
ZC3H4	2	51	0.1566	2.61	0.0345	2.1821	3.2114
BRD4	2	52	0.1661	9.12	0.2692	8.0001	11.5606
GCN1L1	4	53	0.1733	1.72	-1.8499	-0.3939	2.1772
OR4N2	2	54	0.1773	8.3	2.249	9.2007	10.3955
SS18L2	3	55	0.1773	1.76	-1.1945	0.2714	2.1921
C10orf2	4	56	0.1773	1.84	-0.7729	0.7491	2.2759
SAFB	4	57	0.1773	1.16	-0.6659	0.2681	1.3967
NDUFB7	4	58	0.1786	1.63	-0.1788	1.1429	1.9765
FAM25G	4	59	0.1853	1.24	-0.4508	0.5384	1.4793
ZNF658	2	60	0.1966	2.25	-0.1516	1.6972	2.7647
G6PD	4	61	0.1997	1.59	-0.4756	0.8213	1.9393
PRKAR1A	3	62	0.2029	1.25	-0.3318	0.6663	1.4926
COX17	4	63	0.2044	2.42	-1.2214	0.8144	3.0442
PPIL1	3	64	0.2045	1.64	-0.7004	0.6421	2.0075
DOHH	4	65	0.2045	1.32	-0.1073	0.9423	1.5695
C14orf80	3	66	0.2068	2.88	-2.5575	-0.0754	3.7117
LUC7L3	3	67	0.2081	2.54	-1.6649	0.4921	3.2255
TXNRD1	3	68	0.2323	5.11	-0.4907	3.8255	6.4544
CLN3	4	69	0.2334	2.38	0.8888	2.8075	2.8692
GTF2H4	3	70	0.2334	1.35	-0.8615	0.2415	1.6494
SPRED1	3	71	0.2334	2.85	1.6529	3.9456	3.4284
LDB1	4	72	0.2362	1.21	-1.3554	-0.3547	1.4964
ARL8B	4	73	0.2422	0.94	-0.3595	0.3764	1.1003
RSL1D1	4	74	0.2422	1.9	-1.7446	-0.1351	2.4068
MRPL38	4	75	0.2422	1.6	-1.1117	0.2163	1.986
LMF1	3	76	0.2648	3.24	-0.2498	2.4524	4.0407
ABHD11	4	77	0.2793	1.47	-0.6778	0.5209	1.7925
FAM231A	3	78	0.2867	1.22	-0.7466	0.2407	1.4764
UBA3	2	79	0.2867	2.48	-2.2427	-0.1192	3.1755
ZC3H8	3	80	0.2867	0.83	-0.3284	0.3085	0.9524
COASY	3	81	0.2867	1.41	-1.0078	0.151	1.7329
LAMTOR4	2	82	0.2867	2.83	-2.7501	-0.3003	3.6635
PALB2	2	83	0.2867	1.06	1.069	1.847	1.1634
SCAP	3	84	0.2867	1.11	-0.2956	0.5837	1.3149
SNUPN	3	85	0.2867	1.29	-0.2515	0.7797	1.5421
PTCD3	4	86	0.2867	1.38	-0.8058	0.324	1.6895
SREK1	4	87	0.2867	1.31	-0.3319	0.7204	1.5736
MTHFD1	4	88	0.2867	1.44	-0.1375	1.0172	1.7268
KEAP1	4	89	0.2974	1.3	1.5722	2.54	1.4472
PKLR	3	90	0.2974	2.41	-0.8807	1.1338	3.0124
BRICD5	3	91	0.3014	1.62	2.0542	3.2776	1.8295
ZNF707	2	92	0.3014	8.57	0.4938	7.7455	10.8441
MRPL15	3	93	0.3014	1.73	-0.8924	0.5388	2.1402
COPS3	3	94	0.3035	1.52	-1.1473	0.1114	1.8823
HUS1	3	95	0.3035	2.07	-1.816	-0.0587	2.6279
TNRC18	4	96	0.3035	1.44	-0.2942	0.8687	1.739
WDR59	3	97	0.3035	1.58	-1.7658	-0.4328	1.9934
ZC3H13	4	98	0.3035	1.1	0.2251	1.0709	1.2649
NAA30	4	99	0.3035	1.27	-0.7174	0.3127	1.5403
MAST4	3	100	0.3035	3.31	0.343	3.0808	4.094
DDOST	4	101	0.3035	1.53	-1.3342	-0.0607	1.9044
MECR	4	102	0.3035	1.26	-0.7907	0.2302	1.5267
MED25	3	103	0.3035	2.28	-1.2726	0.6411	2.8618
PHGR1	4	104	0.3035	0.93	-0.1796	0.5352	1.0689
RBBP4	4	105	0.3035	1.21	0.0423	0.9949	1.4244
KDM1A	3	106	0.3035	1.95	-0.0188	1.5667	2.3709
IFITM3	4	107	0.3035	2.16	-0.7032	1.0898	2.6813
MYOZ1	2	108	0.3035	2.79	1.09	3.3565	3.3892
KATNB1	2	109	0.3035	1.9	-2.092	-0.4673	2.4296
ZNF655	2	110	0.3047	3.76	0.1487	3.2859	4.6913
LY6G6D	2	111	0.3047	1.81	-0.0843	1.3808	2.1909
MTG1	4	112	0.3103	1.14	-0.1749	0.7186	1.3361
RPUSD4	3	113	0.3114	1.85	-1.3494	0.2033	2.3218
CCAR1	4	114	0.3114	0.94	0.0409	0.7546	1.0672
ZNF98	4	115	0.3114	2.44	0.5573	2.5385	2.9626
MRPL57	2	116	0.3114	2.9	-2.9874	-0.4743	3.758
STRAP	2	117	0.3114	2.28	-2.2197	-0.2652	2.9227
SNF8	3	118	0.3114	4.26	-0.0799	3.4916	5.3408
THRAP3	3	119	0.3114	1.76	-1.4484	0.0299	2.2106
ERO1LB	2	120	0.3137	1.3	1.7826	2.7433	1.4366
LRIG3	3	121	0.3156	1.29	-0.9847	0.0713	1.5791
UBE2C	4	122	0.3186	1.97	-1.516	0.1486	2.4892
GFRA2	2	123	0.3193	1.42	1.0067	2.0984	1.6325
ERMARD	3	124	0.3237	1.8	0.6759	2.1107	2.1456
UQCRC1	3	125	0.3247	1.02	0.9914	1.7411	1.1211
PCYT2	3	126	0.3265	1.38	0.1879	1.2764	1.6277
PCGF1	3	127	0.3321	1.6	0.173	1.4491	1.9083
RECQL4	4	128	0.3321	1.34	-0.4363	0.6438	1.6151
MBTPS1	3	129	0.3321	1.87	-1.0385	0.5156	2.324
RPL7L1	3	130	0.3321	0.93	-0.6145	0.1219	1.1011
LAMTOR2	3	131	0.3321	1.84	-0.4796	1.0318	2.2601
TAMM41	4	132	0.3321	1.57	-0.9584	0.3371	1.9373
ISCA2	4	133	0.3366	1.26	-1.0646	-0.0307	1.5461
CYB5B	3	134	0.3366	1.4	-1.1182	0.0379	1.7288
VPS11	3	135	0.3374	0.62	0.3909	0.8176	0.638
XRCC3	4	136	0.3374	1.87	-1.9699	-0.3762	2.3832
WDR92	2	137	0.3375	2.28	-2.2671	-0.3146	2.9198
TNPO1	2	138	0.3401	2.12	-1.7028	0.0935	2.6861
MRPS5	4	140	0.3401	1.1	-0.9425	-0.0489	1.3364
SIRPB2	4	141	0.3424	0.64	0.8255	1.2574	0.6458
WDR24	3	142	0.3471	1.73	-0.6087	0.8079	2.1183
MED16	3	143	0.3475	1.23	0.1946	1.1556	1.4371
TSEN15	4	144	0.3564	1.44	-1.2743	-0.0763	1.7915
THOC6	4	145	0.3618	2.82	-0.0958	2.2373	3.4889
SLCO1B1	3	146	0.3618	1.5	1.2512	2.4017	1.7204
CD8B	2	147	0.366	8.13	0.1989	7.0832	10.2947
UBR4	4	148	0.366	1.28	-0.5024	0.5267	1.5388
CDH5	3	149	0.366	3.85	-0.3637	2.8691	4.8342
RPP38	3	150	0.3756	1.35	-1.103	0.009	1.6627
TAF1B	3	151	0.378	1.43	-1.2453	-0.0613	1.7704
WDR26	3	152	0.378	1.91	-1.4051	0.1976	2.3967
NUP50	3	153	0.378	1.27	-1.5133	-0.4505	1.5892
SLX1A	2	154	0.378	1.39	0.1953	1.2905	1.6378
CABIN1	3	155	0.378	1.01	-0.9081	-0.0918	1.2207
GTF3C4	3	156	0.3804	1.38	-1.4506	-0.2996	1.7211
CEP350	4	157	0.3824	0.93	-0.6217	0.113	1.0987
MRPS18A	4	158	0.3838	1.46	-0.5298	0.6584	1.7768
ATP5O	4	160	0.3838	1.15	-0.3902	0.5222	1.3644
SNRPD2	3	161	0.384	1.93	-2.383	-0.7192	2.488
ATMIN	4	162	0.384	1.18	-0.3008	0.638	1.4039
SPEN	4	163	0.3886	1	-0.0809	0.6947	1.1599
TRMT61A	2	164	0.3886	1.66	-1.1779	0.2069	2.0708
EARS2	2	165	0.3886	2.03	-1.9564	-0.2283	2.5842
PLS1	1	166	0.3891	7.74	0.508	7.045	9.7754
C19orf40	4	167	0.3923	1.31	-0.5518	0.5032	1.5775
HSPA14	3	168	0.3939	1.65	-1.2594	0.1182	2.06
PPP2R4	2	169	0.4009	0.94	-0.1965	0.5273	1.0823
SGIP1	2	170	0.4009	7.31	1.1209	7.2635	9.1855
PIK3CB	2	171	0.4009	1.5	1.0359	2.1962	1.7351
SERPINB12	1	172	0.4165	6.3	1.5733	6.8359	7.8696
ZNF367	4	173	0.4165	1.07	-0.2875	0.5524	1.256
PPARD	2	174	0.4238	1.09	1.33	2.1261	1.1905
EEF2KMT	4	175	0.4238	1.64	-1.4815	-0.103	2.0614
NDUFV1	3	176	0.4238	1.2	-0.4352	0.5253	1.4363
GATB	4	177	0.4238	1.54	-0.7136	0.5489	1.8879
KRTAP1-5	2	178	0.4238	6.2	0.8946	6.0933	7.7741
HYI	3	179	0.4251	1.06	-0.0038	0.8177	1.2284
TAF1C	2	180	0.4275	1.26	-0.7702	0.2556	1.5339
ATP5D	4	181	0.4275	1.06	0.0095	0.8283	1.2243
OSCP1	3	182	0.4275	1.64	-1.7048	-0.3227	2.0668
ENO1	3	183	0.4275	2.44	-2.1273	-0.0414	3.1192
MINOS1	3	184	0.4275	2.43	-0.5606	1.4617	3.0242
THAP8	3	185	0.4275	1.35	0.1733	1.2338	1.5858
CARKD	3	186	0.4275	2.02	-0.0122	1.6378	2.4674
CENPO	4	187	0.4275	1.01	-0.0876	0.6921	1.1659
VPS37A	4	188	0.4275	1.1	-0.31	0.5572	1.2968
AK6	2	189	0.4275	2.08	-2.6463	-0.8465	2.6915
FUBP1	4	190	0.4275	0.87	-0.4331	0.2447	1.0135
CHTF8	3	191	0.4275	1.38	-0.61	0.5094	1.674
AP3B1	4	192	0.4275	1.33	0.1396	1.1901	1.571
NOS1AP	2	193	0.4275	6.49	1.0862	6.531	8.1422
MAGEB3	2	194	0.4298	7.27	0.0441	6.1938	9.1961
HAMP	4	195	0.4298	1.86	-0.8169	0.7231	2.3029
CHTF18	3	196	0.4298	2.11	-2.3376	-0.5256	2.7097
CHMP3	3	197	0.4334	1.03	-0.2341	0.568	1.1995
TUBGCP3	3	198	0.4334	1.25	-1.2516	-0.2211	1.541
NR5A2	3	199	0.4334	4.71	-0.7513	3.2339	5.9595
LZTS2	3	200	0.439	0.51	0.7271	1.0496	0.4823
EHMT2	3	201	0.439	1.02	-0.433	0.3731	1.2055
ADAT2	2	202	0.439	0.93	0.3794	1.0782	1.0449
KCNE1	3	203	0.4403	1.33	1.106	2.1171	1.5121
CTNNA1	1	204	0.4493	5.96	-1.8117	3.2914	7.631
DDX28	4	205	0.4493	1.02	-0.4122	0.3942	1.2059
PAFAH2	2	206	0.4493	6.53	1.3663	6.835	8.1777
PRPF3	4	207	0.4493	1.15	-1.09	-0.1504	1.4051
POLD2	2	208	0.4527	2.5	-3.8034	-1.5953	3.302
NDUFS1	2	209	0.4527	1.16	0.0539	0.9603	1.3555
ARHGEF9	2	210	0.4545	2.14	0.2809	2.0214	2.6027
VPS33A	3	211	0.4551	1.12	0.2779	1.1416	1.2915
DDX20	2	212	0.462	1.2	-0.5499	0.4096	1.4349
CADM2	2	213	0.462	4.11	1.1942	4.5861	5.0721
MRPS9	4	214	0.462	1	-0.0486	0.7211	1.151
TEKT4	4	215	0.462	1.06	-0.1945	0.6328	1.2371
SSB	4	216	0.4645	1.25	-0.5054	0.4964	1.4981
PDF	3	217	0.4652	3.34	0.9645	3.7096	4.105
TPSB2	3	218	0.4665	1.19	-0.1176	0.8219	1.405
KCNH3	4	219	0.467	0.86	0.3903	1.0218	0.9443
FXN	3	220	0.467	1.12	-0.8601	0.0488	1.3592
MCAT	4	221	0.467	0.78	0.5846	1.1405	0.8313
SNCAIP	1	222	0.467	6.31	0.7003	6.0045	7.9317
HARS2	3	223	0.467	1.03	-0.4854	0.3282	1.2166
CBLC	4	224	0.4754	0.61	0.882	1.2823	0.5986
NOL12	3	225	0.4754	1.28	-1.6604	-0.5858	1.6069
TRIM14	3	226	0.4754	1.33	0.0116	1.0647	1.5747
CERS6	2	227	0.4754	5.97	1.2726	6.2656	7.4665
CCDC12	3	228	0.4754	1.38	-1.2994	-0.155	1.7114
CKS1B	4	229	0.4754	0.87	-0.4329	0.2428	1.0104
EMC6	3	230	0.4754	1.34	-0.7477	0.3438	1.6322
DDX41	4	231	0.4754	1.09	-0.6452	0.226	1.3028
EMG1	4	232	0.4819	0.91	0.1992	0.8831	1.0227
UTP18	3	233	0.4835	1.41	-1.2841	-0.1097	1.7562
PSMG1	2	234	0.4835	1.84	-2.0992	-0.5274	2.3505
GTF3C5	4	235	0.4835	0.77	0.3291	0.8844	0.8304
S100A12	4	236	0.4835	0.86	-0.8526	-0.1705	1.0199
SEC22B	2	237	0.4835	6.26	-1.4315	3.9086	7.9854
MFSD5	2	238	0.4835	2.26	0.3815	2.2154	2.7425
GOLGA6L4	4	239	0.4835	1.01	-0.9809	-0.1691	1.214
VIL1	4	240	0.4835	0.92	-0.008	0.6898	1.0435
NHEJ1	4	241	0.4835	0.71	0.6705	1.169	0.7455
COX15	3	242	0.4835	1.29	-1.3379	-0.2653	1.604
IGSF11	3	243	0.4835	1.42	0.5883	1.7	1.6623
LARS2	4	244	0.4836	1.55	-1.2157	0.0716	1.9251
PA2G4	3	245	0.4836	1.02	0.147	0.9266	1.1658
RNF40	4	246	0.4836	1.46	-0.4959	0.6883	1.7709
LARP1	4	247	0.4836	1.04	0.2049	0.997	1.1846
MRPS28	3	248	0.4836	1.03	-0.3089	0.5008	1.2108
TBL2	4	249	0.4836	0.83	-0.2309	0.4055	0.9516
PRSS54	1	250	0.4836	6.13	1.3434	6.4676	7.6625
BEND3	4	251	0.4836	1.22	-0.6807	0.3054	1.4745
MED21	3	252	0.4838	1.98	-2.5014	-0.7938	2.5534
TM7SF3	2	253	0.4863	1.13	0.0122	0.8933	1.3177
IMP4	2	254	0.4898	1.86	-2.202	-0.612	2.3776
ERCC5	2	255	0.4898	1.52	0.491	1.6896	1.7923
THOC3	2	256	0.4898	1.76	-1.928	-0.4346	2.2333
TMEM208	4	257	0.4904	1.2	-0.7901	0.1838	1.4565
C6orf48	4	258	0.4935	1.29	-1.0284	0.0305	1.5835
CCNH	2	259	0.4935	2.32	-3.2495	-1.2267	3.0249
VRK1	3	260	0.4935	1.27	-0.3269	0.6861	1.5148
C3orf36	2	261	0.5014	6.6	-1.2403	4.3847	8.4115
EIF3H	2	262	0.5014	1.52	-0.9878	0.2696	1.8803
TXNRD2	1	263	0.5014	5.54	0.0923	4.7585	6.9778
C17orf62	4	264	0.5014	0.8	-0.0234	0.5711	0.889
EXO1	4	265	0.5016	1.32	-1.5235	-0.4222	1.6468
SELE	4	266	0.5049	0.98	-1.2249	-0.4278	1.192
TSPAN16	4	267	0.5049	0.99	0.2317	0.9879	1.1308
RAD1	2	268	0.5049	2.12	-1.9199	-0.116	2.6974
SPAG5	1	269	0.5049	6.09	-0.2809	4.8678	7.6993
SEC63	2	270	0.5049	1.06	-0.4554	0.3792	1.2481
TPI1	2	271	0.5049	1.76	-1.4732	0.0062	2.2122
REEP4	2	272	0.5049	0.61	0.3298	0.7486	0.6261
CHCHD4	2	273	0.5064	0.88	-0.4894	0.192	1.0189
TMEM260	2	274	0.5064	6.02	1.0618	6.1019	7.5369
MTOR	2	275	0.5079	6.73	-2.6387	3.1509	8.6576
KIF5B	3	276	0.5137	1.07	0.5655	1.3767	1.2131
CYP2C18	2	277	0.5137	6.12	0.8254	5.9644	7.6847
WDR88	2	278	0.5137	1.48	-0.0227	1.1626	1.7724
CD248	4	279	0.5137	4.27	-0.0982	3.487	5.3613
TIMM9	4	280	0.5137	1.49	-1.362	-0.1206	1.8563
SAE1	2	281	0.5137	1.75	-1.8591	-0.3737	2.2212
PPP2R2A	2	282	0.5137	2.02	-2.9457	-1.1898	2.6257
C10orf67	1	283	0.5138	5.76	0.4565	5.2973	7.2389
NOC4L	3	284	0.5138	1.43	-1.1668	0.0195	1.774
NAA38	2	285	0.5271	2.4	-0.3279	1.6569	2.968
AGPAT2	2	286	0.5271	2.06	-2.7869	-0.9957	2.6785
CTAGE8	2	287	0.5271	0.75	1.5137	2.01	0.7421
TOMM20	3	288	0.5271	0.77	-0.396	0.1937	0.8818
CLK2	4	289	0.5271	1.11	-0.6053	0.2805	1.3245
PDCD6	3	290	0.5271	1.61	-1.8131	-0.4497	2.0388
CD274	3	291	0.5271	1.58	1.3063	2.5257	1.8235
TBCD	2	292	0.5286	2.26	-1.9926	-0.0597	2.8905
FLII	3	293	0.5313	1.8	-1.5361	-0.0243	2.2607
TARDBP	3	294	0.5318	1.58	-1.2752	0.042	1.9697
VPS16	4	295	0.5339	1.43	-0.5185	0.6389	1.7307
PPME1	3	296	0.5345	1.74	-2.2257	-0.7369	2.2263
ITGB7	1	297	0.5345	4.98	-0.3676	3.8322	6.2802
DCDC2	1	298	0.5361	5.6	0.5974	5.292	7.0203
EIF3A	2	299	0.5361	2.3	-2.8577	-0.8593	2.9883
ZBTB18	3	300	0.5361	1.11	-1.6981	-0.7699	1.388
S100A6	4	301	0.5426	0.51	1.2396	1.5429	0.4535
ANHX	4	302	0.5426	2.03	-2.1228	-0.3849	2.5988
VPS4A	4	303	0.5426	1.15	-1.0031	-0.0666	1.4004
KIAA1210	3	304	0.5426	1.2	0.5761	1.4975	1.3779
CHTOP	4	305	0.5426	0.64	0.4513	0.8976	0.6674
NCR1	2	306	0.5426	5.9	0.8099	5.7589	7.4007
UGT1A4	3	307	0.5426	2.45	0.0829	2.092	3.0045
XPO7	3	308	0.5426	0.73	0.6037	1.121	0.7736
SUZ12	2	309	0.5426	1.09	-1.0921	-0.2036	1.3287
FEN1	2	310	0.5426	1.86	-2.443	-0.8445	2.3904
RAD51B	3	311	0.5426	0.83	-0.4054	0.2314	0.9522
GHRHR	4	312	0.5426	1.51	1.0523	2.2182	1.7435
AP2M1	3	313	0.5426	1.61	-1.1206	0.2197	2.0042
IL3	2	314	0.5426	4.21	1.2635	4.7425	5.2024
CRK	4	315	0.5426	1.35	-1.7087	-0.5764	1.6932
LOC388436	4	316	0.5426	1.05	-0.9578	-0.1118	1.265
CAB39	4	317	0.5426	0.73	-0.2154	0.327	0.8112
MRPL53	2	318	0.5426	0.91	-0.0873	0.6072	1.0386
TACR3	4	319	0.5426	1.5	-1.7681	-0.4978	1.8995
TBCK	4	320	0.5426	1.09	-1.2659	-0.3708	1.3386
SNRNP27	2	321	0.5426	0.85	-0.5903	0.0728	0.9917
BTBD17	1	322	0.5426	4.76	0.4146	4.3954	5.9527
SMNDC1	2	323	0.5426	0.44	0.2257	0.5022	0.4136
DNTTIP2	4	324	0.5426	1.22	-1.3118	-0.3023	1.5096
PGBD5	4	325	0.5426	1.31	-1.1205	-0.0415	1.6136
SOX10	3	326	0.5426	1.17	-0.3024	0.6237	1.385
PSME2	2	327	0.5426	0.66	1.2261	1.6541	0.6401
NUP188	3	328	0.5426	1.08	-0.9206	-0.0455	1.3087
VPS41	3	329	0.5426	1.62	-1.591	-0.2267	2.0401
TM2D2	3	330	0.5426	1.08	-0.7834	0.0852	1.2988
TIMM13	3	331	0.5437	0.95	0.3409	1.0511	1.0621
VHL	2	332	0.5442	0.7	-0.1399	0.3742	0.7687
EED	3	333	0.5442	1.28	-0.6967	0.3389	1.5486
COA6	3	334	0.5442	1.25	-1.4737	-0.4317	1.5582
MSX2	2	335	0.5442	1.31	0.7511	1.761	1.5101
ELF1	1	336	0.5472	4.87	0.9203	4.9781	6.0679
ARHGEF38	1	337	0.5472	5.83	-0.9265	4.029	7.4103
RNPS1	4	338	0.5472	1.89	-0.3414	1.2048	2.3121
COX11	4	339	0.5472	0.91	0.1122	0.8004	1.029
YAE1D1	2	340	0.5472	5.99	-1.4872	3.6266	7.6471
ABHD17A	2	341	0.5532	1.31	-1.0895	-0.0104	1.6136
C19orf33	4	342	0.5532	1.36	-1.4022	-0.2663	1.6986
SCO2	3	343	0.5532	0.38	-0.5895	-0.3333	0.3831
GJB2	1	344	0.5559	3.69	0.6874	3.7386	4.5626
FBRS	2	345	0.5591	0.89	1.4426	2.0626	0.9272
DENND1B	1	346	0.5606	5.21	0.2984	4.6761	6.5464
NCAPG2	3	347	0.5606	1.59	-1.7222	-0.3761	2.0129
PSMG2	2	348	0.5606	1.52	-2.2563	-0.9516	1.9509
ZNF516	3	349	0.5608	2.46	-1.061	1.0011	3.0836
DDR1	1	350	0.5647	4.75	1.6765	5.6029	5.8715
APBA2	2	351	0.5655	1.72	-1.0043	0.4231	2.1345
HAUS5	4	352	0.5655	0.75	0.5331	1.0682	0.8002
DCTN4	3	353	0.5655	0.98	-0.6207	0.159	1.1659
YARS2	2	354	0.5659	1.4	-1.1592	0.0013	1.7354
H1FNT	1	355	0.5659	5.06	1.1674	5.3771	6.295
CCDC6	4	356	0.566	1.98	-1.3485	0.3133	2.485
OR2T8	4	357	0.566	0.73	0.3055	0.8329	0.7887
DCAF7	4	358	0.566	0.52	1.2484	1.5569	0.4614
CDC42	3	359	0.566	0.94	-0.1235	0.6032	1.0867
CFD	1	360	0.566	6.99	0.392	6.2887	8.8179
GLRX	1	361	0.566	4.98	1.5835	5.7089	6.169
ZRSR2	3	362	0.566	1.47	-1.1455	0.0721	1.8207
TRUB2	3	363	0.566	0.98	-1.0383	-0.2458	1.1852
TUBGCP2	3	364	0.566	1.3	-1.4726	-0.3853	1.6259
TXN	2	365	0.566	2.25	-3.1272	-1.1594	2.9425
POLA2	2	366	0.566	1.91	-2.8922	-1.2266	2.4906
FOXRED1	3	367	0.566	1.16	-1.3335	-0.3759	1.432
TOMM40	3	368	0.566	1.18	-1.2953	-0.3231	1.4538
ARNT2	4	369	0.566	2.14	-0.4985	1.2731	2.6492
MGAT3	3	370	0.566	2.03	-0.3967	1.2708	2.4935
HBQ1	2	371	0.566	1.69	-2.3695	-0.9189	2.1692
GPR142	3	372	0.566	1.08	-1.2814	-0.3974	1.322
TMEM130	4	373	0.566	0.68	-0.4223	0.0857	0.7597
MTPAP	2	374	0.566	0.1	0.3864	0.3709	-0.0233
MED8	4	375	0.566	0.96	-0.1342	0.6079	1.1098
DHODH	2	376	0.566	2.28	-2.2631	-0.3039	2.9298
UBE2N	2	377	0.566	1.67	-2.2068	-0.7771	2.138
IFT22	4	378	0.566	0.75	-0.2213	0.3412	0.8413
METTL4	2	379	0.566	5.33	-0.4488	4.0569	6.7378
RNF166	4	380	0.5683	0.63	0.164	0.6128	0.6711
ELK3	3	381	0.5683	0.72	0.4347	0.9472	0.7664
NRARP	4	382	0.5683	0.8	0.0528	0.6498	0.8928
RDH12	1	383	0.5683	5.28	0.0378	4.4861	6.6519
C16orf59	2	384	0.5683	1.83	-1.5804	-0.0404	2.303
SETD5	3	385	0.5683	0.98	-1.0629	-0.2694	1.1865
CLPTM1	4	386	0.5683	0.64	0.8841	1.3138	0.6426
LIMD1	1	387	0.5683	6.99	1.1212	6.9932	8.781
PDCD5	4	388	0.5683	0.87	-0.053	0.6073	0.9875
GLRX5	3	389	0.5683	1.96	-1.8172	-0.1501	2.493
SPATA6L	4	390	0.5683	0.86	-1.0592	-0.3724	1.027
CORO6	2	391	0.5683	0.69	1.0104	1.4776	0.6987
DHX35	3	392	0.5683	1.1	-0.3833	0.4907	1.307
MPC2	4	393	0.5683	1.05	-0.9558	-0.1089	1.2664
ZNF514	1	394	0.5683	3.98	1.2039	4.4903	4.9144
UBE3D	3	395	0.5683	0.94	-0.8396	-0.0858	1.1272
UTP23	2	396	0.5683	1.73	-2.1855	-0.7046	2.2146
AURKAIP1	3	397	0.5712	1.64	-1.2368	0.1285	2.0416
MAEA	3	398	0.5712	0.78	0.718	1.27	0.8254
B3GALTL	1	399	0.5712	4.53	0.9758	4.7359	5.6229
INTS12	3	400	0.5724	1.08	-1.0706	-0.1904	1.3162
ERV3-1	3	401	0.5724	1.02	0.0842	0.8639	1.1659
EFR3B	2	402	0.5753	0.82	0.3554	0.9546	0.896
MPI	4	403	0.578	1.13	-0.4798	0.4168	1.3407
RAD51C	2	404	0.578	1.75	-2.3117	-0.8101	2.2455
UTRN	3	405	0.578	5.11	0.7741	5.0419	6.3821
RPL3L	4	406	0.578	0.7	0.1149	0.6212	0.7572
FBL	2	407	0.5825	1.93	-2.7962	-1.1179	2.5096
OAZ1	4	408	0.5825	1.06	-0.6818	0.1645	1.2656
SCN2B	1	409	0.5825	4.25	0.8507	4.3772	5.2735
ZHX3	4	410	0.5836	0.95	-0.7042	0.0539	1.1336
CLEC4G	3	411	0.5862	0.99	-0.4264	0.3533	1.1659
HIST3H3	3	412	0.5862	1.28	-1.0585	-0.0034	1.5778
COPS8	2	413	0.5862	1.35	-1.4546	-0.3292	1.6829
CARD9	3	414	0.5865	1.19	-1.0624	-0.0868	1.4588
TFIP11	3	415	0.5917	1.16	-1.1816	-0.2271	1.4273
ZNF467	3	416	0.5917	0.86	1.0175	1.6277	0.9124
NAA15	2	417	0.5917	0.91	-0.7815	-0.0583	1.0815
EAF1	2	418	0.5917	3.64	-0.8803	2.1907	4.5923
CACYBP	3	419	0.592	0.42	0.4635	0.7167	0.3786
HLA-DOB	3	420	0.592	0.87	0.0912	0.7482	0.9824
KIF2A	2	421	0.592	1.78	-2.2555	-0.7299	2.2813
USP37	2	422	0.592	0.87	-1.2935	-0.5859	1.0581
NDRG4	3	423	0.592	1.08	0.719	1.5322	1.2161
PHB	2	424	0.592	1.76	-2.0485	-0.5467	2.2457
TRAF3	3	425	0.592	2.83	-0.9587	1.4159	3.5509
PPP1R11	3	426	0.592	1.42	-1.3514	-0.1725	1.7629
CREB1	3	427	0.5941	1.22	-2.2916	-1.2469	1.5623
PGAM1	2	428	0.5949	1.35	-0.9971	0.1084	1.653
CRB2	4	429	0.5971	0.74	-0.0953	0.4581	0.8275
TRNAU1AP	3	430	0.5971	1.11	-0.9573	-0.0563	1.3473
FCGR3A	2	431	0.5975	5.35	-0.0709	4.437	6.7411
CEP97	4	432	0.5975	0.89	-0.1839	0.5015	1.0251
KIRREL	4	433	0.6008	0.73	0.4803	0.9975	0.7734
TMEM110-MUSTN1	3	434	0.6021	1.39	-1.8397	-0.6696	1.7498
STARD7	2	435	0.6047	0.67	0.3533	0.8238	0.7036
EPHA2	1	436	0.6063	3.57	1.8483	4.7555	4.3474
OR2M4	4	437	0.6085	1.49	0.2754	1.4577	1.7679
NDUFC2-KCTD14	3	438	0.6099	1.14	-1.3154	-0.3751	1.406
SPDYE1	3	439	0.6115	1.15	-0.9147	0.0154	1.3909
MBD3L5	3	440	0.6115	1.04	-0.7423	0.0929	1.2489
FAM49B	3	441	0.6115	1.02	0.085	0.8686	1.1718
DAPK3	4	442	0.6115	0.84	-0.115	0.5238	0.9552
YPEL5	3	443	0.6127	1.24	-0.9611	0.0546	1.5189
PSMB5	2	444	0.6127	1.71	-2.5154	-1.0393	2.2073
MED13	3	445	0.6127	1.52	-1.0012	0.2533	1.876
ACTR1A	2	446	0.6127	1.72	-2.7528	-1.2556	2.2388
MRPL35	2	447	0.6127	1.42	-1.6084	-0.4127	1.7881
BECN2	2	448	0.6127	4.37	-0.148	3.5259	5.4939
ZGPAT	4	449	0.6153	0.72	0.104	0.6328	0.7908
MEF2A	3	450	0.617	4.89	-0.1755	3.9438	6.16
ATG16L2	4	451	0.617	0.73	-0.8294	-0.2572	0.8555
METTL16	3	452	0.617	1.2	-1.6314	-0.6253	1.5045
PRDM2	3	453	0.617	1.01	-0.6285	0.1772	1.2048
PIH1D3	3	454	0.617	4.17	-0.3708	3.1379	5.247
BAG6	3	455	0.617	1.59	-0.2075	1.074	1.9163
TRIM26	4	456	0.6173	1.15	-0.8807	0.0482	1.3892
PRSS41	3	457	0.6205	1.66	1.271	2.5576	1.9239
FMN2	2	458	0.6216	0.39	0.2892	0.5258	0.3537
CKS2	4	459	0.6216	1.19	-1.3286	-0.3474	1.4673
MEGF6	4	460	0.6225	0.65	-0.0711	0.4043	0.7108
OR7C1	3	461	0.6247	3.86	0.266	3.4785	4.8039
SLC25A5	2	462	0.6247	5.03	-0.4534	3.7989	6.3589
HDHD3	4	463	0.6279	1	-0.7686	0.0278	1.191
RALGAPA1	4	464	0.6287	1.07	0.309	1.1279	1.2245
TOP3A	3	465	0.6287	1.04	0.0664	0.8636	1.1922
SYNJ1	1	466	0.6305	2.64	1.3839	3.5092	3.1781
RLN3	4	467	0.6305	1.46	0.1451	1.3003	1.7274
CDK13	4	468	0.6318	1.12	-1.1419	-0.2254	1.3705
BECN1	4	469	0.6318	0.82	-1.3514	-0.6847	0.997
NLRP4	3	470	0.6318	0.8	0.2496	0.8395	0.8821
MRPL34	3	471	0.6318	1.23	0.1225	1.0869	1.4423
ORAI3	3	472	0.6318	1.18	0.983	1.8735	1.3316
RTTN	3	473	0.6318	0.79	0.4341	1.0057	0.8548
ISM2	2	474	0.6318	2.59	1.4561	3.5322	3.1046
EIF2AK4	4	475	0.6377	1.26	-1.2808	-0.239	1.558
ZC3H18	3	476	0.6417	1.82	-0.2791	1.2084	2.2244
CFAP97	4	477	0.6422	0.73	-0.4768	0.0764	0.8273
CAMTA2	3	478	0.6422	0.83	-0.833	-0.1781	0.9793
PALD1	3	479	0.6422	1.06	-0.618	0.2254	1.2612
FBN1	1	480	0.6422	3.61	1.3438	4.3065	4.4303
ZGLP1	3	481	0.6422	2.43	0.2404	2.2259	2.9692
LBX1	1	482	0.6422	3.57	1.7091	4.624	4.359
CALHM3	3	483	0.6422	1.23	-1.9802	-0.9336	1.5651
FGFR1	4	484	0.6422	1.14	-1.198	-0.261	1.4013
MDM1	1	485	0.6435	3.93	0.7906	4.0452	4.8669
TAOK1	2	486	0.6435	2.67	3.1279	5.2124	3.1172
ATP13A2	4	487	0.6435	2.6	1.2065	3.3058	3.1392
WTAP	3	488	0.6435	0.24	0.3778	0.4789	0.1513
MMS19	2	489	0.6435	1.48	-2.1356	-0.8714	1.8906
C8orf4	2	490	0.6435	-0.01	0.6963	0.5693	-0.1899
ANKRD13D	3	491	0.6435	0.99	-0.6877	0.096	1.1719
GTPBP3	3	492	0.6435	3.76	1.0438	4.1405	4.6307
NDUFA6	3	493	0.6435	0.93	-0.222	0.4939	1.0705
MRPS18C	4	494	0.6435	1.98	-1.6632	0.0126	2.5059
OR2A5	4	495	0.6435	0.91	-0.3475	0.3546	1.0499
FAM83B	1	496	0.6462	4.15	0.6145	4.065	5.1599
ZNF428	2	497	0.6462	1.65	1.0219	2.3145	1.933
ZNF445	4	498	0.6462	1.05	-0.4058	0.4226	1.2388
OSCAR	3	499	0.6462	1.12	-0.929	-0.023	1.3547
P2RY11	2	500	0.6464	5.54	0.8529	5.4865	6.9291
NHP2	2	501	0.6464	1.37	-1.6735	-0.5202	1.7247
ARHGEF39	3	502	0.6464	1.04	-1.2253	-0.3752	1.2712
POTEF	2	503	0.6464	1.68	1.0713	2.3867	1.967
MSC	2	504	0.6464	3.89	0.588	3.8183	4.8306
POLRMT	2	505	0.6464	1.3	-1.0525	0.0112	1.5906
GALM	1	506	0.6464	3.7	1.4091	4.4401	4.5325
HSPG2	3	507	0.6476	0.95	-0.6173	0.1331	1.1222
HYAL4	4	508	0.6485	2.3	0.6415	2.5005	2.7801
CROT	2	509	0.6485	4.09	-0.2902	3.1434	5.1346
FRMD4B	3	510	0.6485	0.91	-0.6508	0.0643	1.0693
GLE1	4	511	0.6485	1.02	-0.7255	0.0861	1.2137
PDCD11	2	512	0.6485	0.73	-1.296	-0.7069	0.8808
NAGLU	4	513	0.6485	0.66	0.5132	0.9683	0.6807
AQP8	3	514	0.6485	3.15	1.8464	4.3894	3.8028
SMARCD1	3	515	0.6485	0.69	0.7915	1.265	0.7081
TKT	4	516	0.6489	1.54	0.0779	1.3065	1.8374
RAD23B	3	517	0.6491	0.79	-0.6414	-0.0301	0.914
PNMA5	3	518	0.6499	3.49	1.1779	4.0451	4.2876
BCKDHA	3	519	0.6523	3.63	0.1123	3.1388	4.5257
FUT4	1	520	0.6523	3.48	0.357	3.2471	4.3218
ETFDH	1	521	0.6523	3.95	-0.2228	3.0927	4.9579
FAAH	2	522	0.6527	1.49	-1.9599	-0.6903	1.8986
LY6H	2	523	0.6527	4.08	0.3675	3.771	5.0895
GPT	3	524	0.6527	0.23	0.4678	0.56	0.1378
C20orf202	1	525	0.6527	3.81	-0.8596	2.3582	4.8118
KCNA6	3	526	0.6527	2.22	0.0672	1.8839	2.7167
CT47A3	3	527	0.6527	1.51	-2.1876	-0.8967	1.9303
SKP2	3	528	0.6527	1.79	-2.2043	-0.6711	2.2927
OBSL1	1	529	0.6527	1.97	0.8161	2.3869	2.3489
OGT	2	530	0.6527	2.21	-3.0729	-1.1443	2.8839
LSM11	3	531	0.6527	0.99	-0.1903	0.5769	1.1473
LIX1	1	532	0.6532	3.64	0.1814	3.2148	4.5361
CES2	3	533	0.6544	0.74	0.238	0.7712	0.7973
ZC3HC1	2	534	0.6544	0.57	0.0513	0.4491	0.5949
DISC1	2	535	0.6544	3.66	0.9048	3.9239	4.5148
AP2A1	3	536	0.6544	1.04	-0.8423	-0.0041	1.2534
KCMF1	2	537	0.6545	1.68	-2.7348	-1.2736	2.185
POP1	3	538	0.6545	1.61	-1.2765	0.0675	2.0099
KIAA2013	2	539	0.6545	3.26	0.1669	2.8743	4.0486
SNX29	2	540	0.6545	1.43	-0.3906	0.7616	1.7229
RPE	2	541	0.6545	1.91	-3.0872	-1.4125	2.5043
MRPL17	2	542	0.6545	1.22	-0.8376	0.1521	1.4801
CFC1B	2	543	0.6545	4.17	-0.297	3.2026	5.2333
SMCP	1	544	0.6545	3.41	0.7314	3.5398	4.1996
TRMT6	2	545	0.6545	0.92	-0.811	-0.0759	1.0992
SND1	3	546	0.6545	1.74	0.7074	2.0883	2.0649
ANAPC4	3	547	0.6545	1.01	-1.3939	-0.5633	1.242
KIAA2012	3	548	0.6545	0.61	-0.5769	-0.1183	0.6858
TCTN2	2	549	0.6545	3.2	1.0113	3.6317	3.9186
TK1	3	550	0.6545	2.02	-0.1567	1.4966	2.4723
TEAD1	3	551	0.6545	0.71	-0.3685	0.1661	0.7994
EZH2	2	552	0.6545	1.84	-2.4928	-0.901	2.3804
SHISA9	1	553	0.6545	4.13	0.0223	3.4792	5.1694
PRB3	2	554	0.6545	0.24	0.6999	0.7864	0.1294
ZBTB47	2	555	0.6545	4.32	0.3203	3.9304	5.3985
IST1	2	556	0.6545	0.99	-0.5423	0.2384	1.1674
TBC1D15	3	557	0.655	0.82	0.1376	0.7478	0.9125
MYCN	1	558	0.6566	3.77	1.1199	4.2229	4.6401
ALDH9A1	3	559	0.6566	0.36	0.4095	0.6175	0.3111
WDR25	3	560	0.6566	1.75	-2.8678	-1.3399	2.2849
PSMA2	3	561	0.6572	0.86	-1.3037	-0.6068	1.0421
PCDHGA3	2	562	0.6622	0.29	0.0271	0.1864	0.2382
CCDC85B	3	563	0.6632	1.02	-0.489	0.3151	1.2025
UQCRC2	3	564	0.6632	0.58	1.1421	1.5053	0.5432
MYBPC3	1	565	0.6632	6.08	0.8126	5.9186	7.6353
MRPL44	2	566	0.6658	1.53	-1.8445	-0.5502	1.9354
C16orf46	2	567	0.6678	0.84	1.6014	2.1686	0.8481
DR1	1	568	0.6678	3.05	-3.0972	-0.4524	3.955
OR5M11	1	569	0.6678	3.23	0.5153	3.1846	3.9916
HLA-DOA	2	570	0.6697	0.65	0.7446	1.1822	0.6543
SENP8	1	571	0.6706	3.9	0.5288	3.7655	4.8401
DYRK1A	2	572	0.6718	2.59	-0.5202	1.631	3.2168
NPIPA5	1	573	0.6718	4.62	-0.0884	3.7971	5.8104
DCAF8L1	3	574	0.6718	0.91	-1.2372	-0.5002	1.1021
DPEP1	2	575	0.675	3.58	0.7038	3.659	4.4191
LONP2	3	576	0.677	1.27	-1.1678	-0.1204	1.5664
BRWD1	1	577	0.6774	2.93	0.0101	2.4346	3.6257
SNX18	1	578	0.6796	3.3	0.054	2.7957	4.0999
ZNF559	3	579	0.6805	0.15	1.2375	1.226	-0.0173
LOR	2	580	0.6805	0.17	0.4746	0.5107	0.054
MSANTD4	3	581	0.6828	4.34	-0.034	3.606	5.4431
DDX6	3	582	0.6836	1.13	-0.9302	-0.0145	1.3694
FBXL16	3	583	0.6836	0.55	1.0552	1.4	0.5157
CYP4X1	3	584	0.6836	0.76	-0.0672	0.496	0.8423
PIAS3	3	585	0.6836	0.79	-0.3128	0.2897	0.901
MRPL33	3	586	0.6836	1.37	-1.8689	-0.7075	1.7367
HK3	1	587	0.6836	3.17	0.613	3.2249	3.9058
SMOC2	2	588	0.6836	1.09	1.3974	2.1879	1.182
HSCB	2	589	0.6836	1.36	-1.5985	-0.459	1.704
NBPF12	2	590	0.6836	2.54	0.9339	2.992	3.0777
CD34	2	591	0.6838	3.17	-0.4962	2.1549	3.9644
TSPO2	1	592	0.6838	2.72	1.8305	4.0081	3.2563
OR51F1	1	593	0.6838	2.72	0.3172	2.5558	3.3474
RPRD1B	2	594	0.6838	1.14	-1.1295	-0.1977	1.3933
TNFSF10	1	595	0.6838	3.56	0.727	3.6704	4.4014
NOSIP	3	596	0.6838	0.52	0.8537	1.1793	0.4869
VMAC	3	597	0.6842	1.38	-0.8712	0.2571	1.6872
G6PC	2	598	0.6846	1.01	-1.5235	-0.6891	1.2477
ARMC9	3	599	0.6846	1.77	0.337	1.7536	2.1183
HBA2	2	600	0.6846	0.66	-0.0607	0.4215	0.721
RNF225	2	601	0.6846	0.93	-0.7753	-0.0363	1.1051
GOT2	2	602	0.6846	1.13	-0.9189	0.0016	1.3765
SCN5A	3	603	0.6846	1.12	-2.0878	-1.1358	1.4236
GPD1L	3	604	0.6846	0.69	0.368	0.8597	0.7352
RAB32	3	605	0.6846	0.96	-1.1722	-0.3933	1.1647
SARS2	3	606	0.6846	0.63	-0.3889	0.0786	0.699
MT2A	1	607	0.6846	2.61	0.2842	2.4275	3.205
TRIP12	2	608	0.6846	0.95	1.9832	2.6298	0.9669
MFAP1	2	609	0.6846	1.8	-2.7625	-1.1943	2.3451
LYST	1	610	0.6846	5.4	-1.3014	3.301	6.8824
CUX1	2	611	0.6846	3.1	1.555	4.0671	3.7566
RNPC3	3	612	0.686	1.67	-1.4875	-0.0878	2.0931
LRRD1	1	613	0.686	3.19	-0.0386	2.6151	3.9682
CRIM1	3	614	0.686	1.1	-0.5858	0.2893	1.3086
EPHA1	2	615	0.686	1.58	-0.5798	0.7143	1.9353
CRHBP	2	616	0.6874	3.65	-0.7361	2.3363	4.5943
ZNF362	3	617	0.6874	0.62	0.4339	0.8611	0.6389
NMT1	3	618	0.6893	1.13	-1.2722	-0.3389	1.3956
FIGNL1	2	619	0.6893	4.27	-0.3631	3.2317	5.3756
TMCO1	2	620	0.6895	2.73	0.2321	2.4789	3.3598
ILF2	2	621	0.6895	1.69	-2.001	-0.5603	2.1545
ZNHIT6	2	622	0.6896	1.69	-2.7381	-1.267	2.1999
NEDD8-MDP1	3	623	0.6933	0.56	0.7014	1.0643	0.5427
CDC73	3	624	0.6963	0.93	-0.4708	0.2607	1.0939
TTC14	2	625	0.6963	1.18	-1.2	-0.2341	1.4445
AAMP	2	626	0.6963	0.33	-0.4409	-0.233	0.3109
GEMIN8	2	627	0.6963	1.08	0.0056	0.8431	1.2524
NCL	3	628	0.6963	1.14	-1.896	-0.9305	1.4438
PPP1R3D	3	629	0.6963	1.17	0.3796	1.2793	1.3455
TOR1B	3	630	0.6963	0.42	0.3405	0.6016	0.3904
DPYSL5	1	631	0.6963	3.49	1.2325	4.0931	4.2777
UBXN8	2	632	0.6963	1.07	-0.9334	-0.0717	1.2886
MST1L	3	633	0.6963	1.08	-0.9369	-0.0653	1.3033
AQP2	2	634	0.6963	3.23	-0.1812	2.5113	4.0264
BRSK1	2	635	0.6963	1.11	-0.0332	0.8339	1.2966
ZNF510	2	636	0.6963	3.75	1.1224	4.2147	4.6242
GMFG	2	637	0.6968	0.49	-0.6185	-0.2643	0.5297
NUP43	3	638	0.6968	1.43	-1.7818	-0.5779	1.8004
KIAA1468	3	639	0.6968	4.18	0.6442	4.1168	5.1928
OGFOD1	3	640	0.6968	0.7	0.1594	0.6654	0.7567
RNF186	2	641	0.6968	3.17	1.6769	4.2474	3.8438
NINL	3	642	0.6968	0.61	0.7253	1.1311	0.6069
TBC1D3B	3	643	0.6968	1.01	-1.3371	-0.5063	1.2423
TP53TG3C	3	644	0.6968	0.97	-1.1975	-0.4043	1.1861
C9orf78	1	645	0.6968	2.98	-0.7599	1.74	3.7383
MCM5	2	646	0.6968	1.81	-0.6078	0.8836	2.2302
RAB40A	2	647	0.6968	2.94	-0.3571	2.0886	3.6572
UROD	3	648	0.6968	0.99	-0.5057	0.2769	1.1703
PCNT	2	649	0.6968	0.94	-0.24	0.4868	1.0868
PTPRU	3	650	0.6968	1.23	-0.15	0.8225	1.4542
FKBP4	2	651	0.6968	5.14	-0.5402	3.8103	6.5056
SMARCA5	3	652	0.6968	1.22	-0.8709	0.1227	1.4859
ARTN	1	653	0.6968	2.24	1.6757	3.4501	2.6534
TMEM230	3	654	0.6968	2.24	0.1805	2.0075	2.732
PLEKHM1	3	655	0.6968	0.74	-0.5263	0.041	0.8483
ADK	1	656	0.6968	5.15	0.8903	5.1932	6.4344
RTF1	2	657	0.6968	1.8	-1.8292	-0.2975	2.2905
IKZF4	3	658	0.6968	0.87	-0.2208	0.4441	0.9942
IER2	2	659	0.6968	5.05	1.2664	5.4636	6.2764
TF	1	660	0.6968	2.45	0.3002	2.3069	3.0008
ATXN1	2	661	0.6968	1.03	0.509	1.2879	1.1647
FLNA	3	662	0.6968	0.32	0.1821	0.3597	0.2656
TACR2	2	663	0.6968	3.25	1.2417	3.8996	3.9745
PAK6	3	664	0.6968	1.06	-0.8714	-0.0151	1.2804
COX6B1	3	665	0.6968	1.36	-1.5551	-0.4192	1.6987
PAK2	3	666	0.6968	1.07	-0.2365	0.6005	1.2516
EID3	2	667	0.6968	1.69	-2.7453	-1.2785	2.1936
CEBPA	3	668	0.6968	0.52	0.9497	1.2673	0.4749
TPP2	3	669	0.6968	1.31	-2.1068	-0.9939	1.6642
FAM163A	3	670	0.6968	1.17	0.2466	1.1529	1.3552
DLL1	3	671	0.6968	0.78	-1.4618	-0.827	0.9493
EGR1	3	672	0.6968	0.83	1.141	1.7211	0.8675
ABCA3	2	673	0.6968	4.78	0.7748	4.7632	5.9641
SPNS1	2	674	0.6968	0.72	0.1744	0.7006	0.7869
KIAA1524	3	675	0.6968	1.16	-1.0412	-0.0924	1.4188
SRF	2	676	0.6968	1.87	-2.4413	-0.8265	2.4148
ZNF891	1	677	0.6968	2.85	-0.4741	1.8992	3.549
DNTT	2	678	0.6968	1.31	-1.767	-0.6644	1.6488
SERPING1	1	679	0.6968	3.97	1.0658	4.3491	4.9098
GAPDHS	2	680	0.6968	0.96	-1.21	-0.4318	1.1637
RMI1	2	681	0.6968	2.51	-0.104	1.9654	3.0946
SMG6	3	682	0.6968	1.58	-1.6973	-0.3674	1.9888
POLR3E	3	683	0.6968	1.19	-1.6075	-0.615	1.4842
RPS25	2	684	0.6968	1.35	-1.6653	-0.529	1.6993
OR2J3	1	685	0.6968	2.87	1.8687	4.1733	3.4462
PCDH20	2	686	0.6968	-0.52	0.2621	-0.2864	-0.8202
GATC	3	687	0.6968	1.25	-1.3913	-0.3522	1.5539
TJP3	3	688	0.6968	0.73	0.5806	1.0981	0.7739
ENKD1	3	689	0.6968	1.07	0.1711	0.9924	1.2282
PANX2	1	690	0.6968	2.7	-0.1614	2.0776	3.3481
ERCC2	3	691	0.6968	1.01	-0.7833	0.021	1.2027
FOXE3	2	692	0.6968	2.42	1.8549	3.7719	2.8667
TTI1	2	693	0.6968	0.3	0.154	0.3161	0.2424
TIMP2	1	694	0.697	1.87	-0.3505	1.176	2.2827
LRRC1	3	695	0.697	0.7	-0.7145	-0.1757	0.8056
CXCL6	1	696	0.6973	1.63	1.8833	3.1246	1.8562
CRAMP1L	2	697	0.6973	1.04	-1.1333	-0.2839	1.2702
TIGIT	3	698	0.6982	0.97	-1.4766	-0.6751	1.1985
HEATR1	2	699	0.6982	1.84	-2.5466	-0.9621	2.3695
NPIPB3	2	700	0.6983	1.42	-1.8462	-0.6467	1.7936
BTBD2	2	701	0.6997	2.6	1.628	3.7079	3.1103
SOCS3	3	702	0.702	1.23	-1.0306	-0.0214	1.5091
VWA2	3	703	0.702	1.86	0.6092	2.0936	2.2197
MMACHC	3	704	0.702	2.56	-0.4446	1.6817	3.1797
MRPL14	2	705	0.702	1.38	-1.6485	-0.4858	1.7387
FGFBP2	2	706	0.702	3.27	0.7889	3.4778	4.0209
ATG9A	3	707	0.7023	0.55	0.1329	0.5147	0.5709
ZC3H10	3	708	0.7023	0.6	-0.3207	0.1162	0.6534
USP1	1	709	0.7023	3.09	-3.5879	-0.8821	4.0462
PPT2	1	710	0.7023	2.17	0.4484	2.2068	2.6296
PRR12	3	711	0.7023	0.98	0.2428	0.9831	1.107
UBA6	2	712	0.7023	1.18	-1.052	-0.0838	1.4478
DUSP9	1	713	0.7023	3.66	1.4175	4.4147	4.4819
UPF2	3	714	0.7023	0.72	-0.2692	0.2679	0.8032
LSG1	2	715	0.7023	1.34	-2.0519	-0.9097	1.7082
PIANP	2	716	0.7023	3.94	0.5701	3.8442	4.8961
C3orf17	3	717	0.7023	0.98	-0.936	-0.1451	1.1826
SYT3	3	718	0.7023	1.08	-1.1058	-0.2275	1.3134
FH	3	719	0.7023	0.57	-0.4813	-0.0638	0.6244
GADD45G	3	720	0.7023	0.52	0.8802	1.2066	0.488
GTF2H3	3	721	0.7023	1.39	-1.0875	0.0549	1.7083
TMEM60	3	722	0.7023	2.98	0.2175	2.6796	3.6817
NDUFS8	3	723	0.7023	0.84	-0.5809	0.0773	0.9843
PTPRJ	3	724	0.7023	0.43	-0.6079	-0.3008	0.4593
STIP1	3	725	0.7023	1.04	-0.3917	0.4308	1.23
PIK3R2	2	726	0.7023	1.58	-0.8228	0.4754	1.9412
SPSB3	3	727	0.7023	0.7	-0.3477	0.1733	0.7791
LIMS3L	2	728	0.7023	0.76	-0.1345	0.4326	0.8481
KIDINS220	1	729	0.7023	2.04	1.1618	2.7782	2.4172
SH2D3C	3	730	0.7023	0.6	0.2462	0.6642	0.6251
HTRA3	1	731	0.7023	2.13	1.5695	3.2487	2.5111
MAP4K1	3	732	0.7023	0.8	-0.1352	0.4658	0.8988
SFSWAP	2	733	0.7023	-0.28	0.9633	0.5986	-0.5453
DOK3	3	734	0.7023	0.56	0.3104	0.6898	0.5673
MRPS26	3	735	0.7023	0.96	-0.7725	-0.0035	1.15
SCYL3	2	736	0.7023	1.48	-1.9597	-0.7059	1.875
ARHGEF11	3	737	0.7023	0.89	-0.6843	0.0159	1.0471
DUSP13	2	738	0.7023	0.74	-0.8619	-0.2842	0.8639
UBE2H	2	739	0.7023	0.74	-0.4311	0.1314	0.8412
PAQR6	3	740	0.7023	1.64	-1.7072	-0.3246	2.0675
ITPK1	3	741	0.7023	0.94	0.224	0.9308	1.057
BICC1	3	742	0.7023	0.99	0.2111	0.9638	1.1257
ZNF593	2	743	0.7023	0.46	1.0128	1.2781	0.3966
SLC25A34	2	744	0.7023	2.95	0.8127	3.2297	3.6142
RAD51D	2	745	0.7023	0.78	-1.1932	-0.5636	0.9415
UQCRHL	3	746	0.7023	0.68	-0.512	0.0049	0.773
DCTN1	3	747	0.7023	-0.07	0.9315	0.7502	-0.2711
LAMP5	1	748	0.7023	1.91	1.2628	2.7643	2.2453
TCEB1	2	749	0.7023	0.34	-0.5294	-0.3057	0.3345
ACSM6	2	750	0.7023	0.07	0.2879	0.2487	-0.0587
ARPC4	3	751	0.7023	0.82	-0.1515	0.4705	0.9301
RBMY1A1	1	752	0.7023	2.88	0.619	2.9809	3.5319
RAB3GAP2	3	753	0.7023	0.93	-0.2367	0.4826	1.0756
PLXNA2	3	754	0.7023	0.94	-0.6234	0.1165	1.1064
ZNF574	2	755	0.7038	1.6	-1.8729	-0.5176	2.0267
GATSL3	1	756	0.7038	2.75	1.2256	3.4475	3.3226
RUNX3	2	757	0.7038	1.11	0.1458	1.0062	1.2866
PLK4	2	758	0.7038	1.45	-2.4468	-1.1977	1.8678
WAC	3	759	0.7038	0.64	0.0011	0.4599	0.6862
ZNF816-ZNF321P	3	760	0.7038	0.66	-0.4526	0.0427	0.7406
DDR2	2	761	0.7038	0.86	-0.283	0.3758	0.9852
ZDHHC15	2	762	0.7038	1.01	-0.7794	0.0301	1.2105
FASN	3	763	0.7038	1.08	-1.004	-0.1305	1.3063
GCNT3	3	764	0.7038	0.21	0.0738	0.1609	0.1302
TBXA2R	1	765	0.7038	1.96	1.877	3.3959	2.2713
COMMD7	3	766	0.7038	0.68	-0.7848	-0.2567	0.7896
IFNL3	2	767	0.7038	0.49	-0.5489	-0.2003	0.5213
NIF3L1	3	768	0.7038	0.62	0.1392	0.575	0.6516
OR13D1	2	769	0.7038	3.27	0.8816	3.5711	4.0219
ZNF549	3	770	0.7038	1.25	-0.3042	0.6907	1.4878
ABLIM1	3	771	0.7038	3.16	0.3227	2.9385	3.9117
WDR73	3	772	0.7038	0.64	0.0584	0.515	0.6828
OTUB1	3	773	0.7038	0.51	0.0349	0.3781	0.5132
MMGT1	3	774	0.7038	1.05	-0.536	0.3006	1.2509
MCM2	3	775	0.7038	0.72	0.2336	0.7568	0.7824
ZNF653	2	776	0.7038	3.06	0.6117	3.1288	3.764
TRMT112	2	777	0.7038	1.32	-1.6932	-0.5831	1.66
CD70	3	778	0.7038	1.28	-0.0266	0.9846	1.5122
ZWINT	3	779	0.7038	1.51	-1.6594	-0.3877	1.9016
USP17L18	3	780	0.7038	1.73	-2.5475	-1.0533	2.2345
BARD1	2	781	0.7038	1.41	-1.4986	-0.3177	1.766
NDEL1	1	782	0.7044	2.83	-0.1734	2.1772	3.5151
ADCY3	1	783	0.7044	3.39	-0.2298	2.6051	4.2392
MEIS2	3	784	0.7044	2.31	1.087	2.9437	2.7766
LDHD	3	785	0.7044	0.69	0.323	0.8142	0.7344
LLGL1	3	786	0.7044	0.5	0.5523	0.8679	0.4719
RPP14	3	787	0.7044	0.36	0.2411	0.4489	0.3107
PTGES3	3	788	0.7044	0.89	-0.4424	0.2483	1.0329
MYNN	2	789	0.7044	3.82	1.058	4.2101	4.7136
GGTLC1	3	790	0.7044	1.07	0.9245	1.7158	1.1833
TRMT11	2	791	0.7044	0.84	0.4029	1.0218	0.9255
LAMTOR5	3	792	0.7044	1.69	-2.3437	-0.889	2.1753
WFIKKN1	3	793	0.7044	0.64	0.0792	0.5348	0.6813
RTEL1	3	794	0.7044	0.94	-1.1501	-0.3854	1.1434
USP7	2	795	0.706	0.72	0.096	0.6232	0.7884
ARHGAP32	1	796	0.7067	3.34	-0.1896	2.5981	4.1687
FBXL8	3	797	0.7077	0.71	0.7368	1.2327	0.7417
GPATCH2L	1	798	0.7082	3.29	-0.1169	2.6281	4.1049
AQP7	3	799	0.7083	0.73	-0.2133	0.3367	0.8226
HMGB1	2	800	0.7083	1.11	0.4731	1.3213	1.2685
RRAD	2	801	0.7083	2.93	0.6951	3.0951	3.589
DTYMK	3	802	0.7083	0.84	-0.091	0.5483	0.956
SEC14L3	1	803	0.7099	2.62	0.6594	2.7992	3.1999
AHCTF1	3	804	0.7103	0.9	-1.0461	-0.3186	1.0878
ADCY1	1	805	0.7109	2.32	1.3672	3.2184	2.7682
COX7C	3	806	0.7109	0.62	0.2925	0.723	0.6438
HEXA	1	807	0.712	4.7	0.3288	4.2621	5.8818
ADRBK1	2	808	0.712	0.63	0.5732	1.0066	0.648
PDE6G	3	809	0.712	2.75	-0.6297	1.6667	3.434
ASB16	1	810	0.7122	2.15	0.2972	2.0458	2.6147
CACNA1B	3	811	0.7154	0.84	-0.1662	0.4698	0.9511
PDCL	3	812	0.7154	1.15	-0.4812	0.4373	1.3736
HIST1H2BI	3	813	0.7154	1.08	-0.82	0.0468	1.2963
TNFSF8	1	814	0.7154	1.6	0.8357	2.0859	1.8695
FKBP9	3	815	0.7154	1.17	-0.8493	0.1022	1.423
EHMT1	3	816	0.7157	0.93	-0.3416	0.3821	1.0822
RASAL1	2	817	0.7157	2.05	0.9362	2.569	2.4416
ARFIP1	2	818	0.7157	2.77	0.3803	2.6527	3.398
CHRNA4	1	819	0.7157	2.69	-0.8385	1.4175	3.3736
MRPS14	3	820	0.7157	0	0.1662	0.0681	-0.1467
ASUN	3	821	0.7157	0.88	-0.1363	0.5325	1.0002
CCK	3	822	0.7157	2.36	1.3877	3.2754	2.8228
TARS2	3	823	0.7157	1.26	-1.3262	-0.2865	1.5547
CCL24	3	824	0.7157	0.57	-0.0666	0.3326	0.5969
ATIC	3	825	0.7157	1.4	-1.8651	-0.6812	1.7704
MSRA	1	826	0.7157	2.25	1.7389	3.5186	2.6613
MRPS6	2	827	0.7157	1.33	-2.4073	-1.2626	1.7117
CSNK2B	2	828	0.7157	0.63	-1.2203	-0.722	0.7452
NDRG1	2	829	0.7157	3.46	0.6201	3.4784	4.2743
KIAA0408	2	830	0.7157	1.47	0.9363	2.0773	1.7062
DNAJB6	3	831	0.7157	1.11	-1.0324	-0.1289	1.3512
DDIT3	1	832	0.7157	2.63	0.192	2.3525	3.2309
GPR157	1	833	0.7157	2.31	1.7244	3.5534	2.735
UBE2D2	2	834	0.7157	0.44	-0.7602	-0.4402	0.4786
RGS9	3	835	0.7163	1.12	-1.1834	-0.2655	1.3726
GIPC1	2	836	0.718	0.83	-1.4546	-0.7721	1.0206
ADAMTS5	3	837	0.718	0.88	-0.5359	0.1519	1.0286
LRFN4	3	838	0.718	0.49	0.2449	0.5641	0.4774
ACTR5	2	839	0.718	0.95	-0.9893	-0.2236	1.1451
SERPINF2	3	840	0.718	1.15	1.3648	2.2132	1.2687
MRPS34	3	841	0.718	1.44	-1.6099	-0.3959	1.8154
POMT1	3	842	0.718	1.3	-0.4985	0.5461	1.5621
EXO5	3	843	0.718	0.69	-0.6308	-0.1006	0.7929
ZBTB41	1	844	0.718	4.06	-0.1513	3.2515	5.0884
CXCL8	3	845	0.718	0.49	-0.8163	-0.452	0.5446
NDUFS2	3	846	0.718	1.13	-0.8037	0.1103	1.3668
ZBTB43	3	847	0.718	0.59	0.1495	0.5648	0.6211
PTPN1	2	848	0.718	1.27	-1.0099	0.0341	1.5612
CCDC60	1	849	0.718	2.15	0.5132	2.2534	2.6023
HHAT	3	850	0.718	0.03	0.4639	0.384	-0.1195
HSD3B2	2	851	0.718	0.83	0.4178	1.022	0.9034
ABCC10	3	852	0.718	1.08	-1.1205	-0.2352	1.3239
GOLGA8M	1	853	0.718	2.23	0.5935	2.3964	2.6961
SNCG	3	854	0.718	1.06	-1.6949	-0.8118	1.3206
FERMT2	2	855	0.718	1.44	-1.4379	-0.2368	1.7962
C11orf1	1	856	0.718	3.81	0.9941	4.1415	4.7065
POLR2J3	2	857	0.718	1.26	-1.474	-0.4219	1.5733
PSEN2	3	858	0.7191	1.2	-0.4818	0.4806	1.439
GATA4	2	859	0.7194	0.65	1.8645	2.2653	0.5993
SPATC1L	3	860	0.7194	0.98	0.6089	1.3374	1.0894
AMIGO1	3	861	0.7194	2.98	-0.2626	2.2188	3.7106
ELOVL5	3	862	0.7194	0.96	-0.3704	0.3799	1.1219
HDAC7	3	863	0.7195	0.87	-0.24	0.4285	0.9997
ZNF528	2	864	0.7198	2.02	0.8567	2.469	2.411
EIF2D	3	865	0.7199	1.15	-1.4224	-0.4732	1.4194
REST	2	866	0.7199	1.32	-2.02	-0.901	1.6734
STAT1	2	867	0.7199	1.57	0.8262	2.0573	1.8409
RRAGC	3	868	0.7214	0.81	0.017	0.621	0.9033
C10orf32	3	869	0.7216	0.01	1.4056	1.2748	-0.1957
MRPS2	3	870	0.7216	1.18	-1.7684	-0.7775	1.4818
TDGF1	2	871	0.7216	2.62	-0.3695	1.8025	3.248
SMG7	3	872	0.7216	1.05	-0.9818	-0.1348	1.2667
XBP1	3	873	0.7216	2.39	0.1998	2.1517	2.9188
MRPL41	2	874	0.7216	0.94	-0.9453	-0.1945	1.1228
RBMS2	2	875	0.7216	1.06	-0.4693	0.37	1.2551
ZNF776	2	876	0.7216	2.17	0.8528	2.5963	2.6071
SIGLECL1	3	877	0.7216	0.7	-0.9494	-0.4003	0.821
PIN1	3	878	0.7216	0.67	0.16	0.6417	0.7203
ZCCHC9	3	879	0.7226	0.91	-1.0772	-0.346	1.0934
SEC14L6	2	880	0.7226	2.77	0.5715	2.8371	3.388
PDLIM5	2	881	0.7244	1.51	1.437	2.5914	1.7262
ZNF585A	2	882	0.7249	2.74	-0.4343	1.849	3.4145
ZNF555	2	883	0.7256	3.26	0.6569	3.3424	4.0159
AK3	2	884	0.7273	-0.22	0.965	0.6468	-0.4757
SMG1	2	885	0.7273	1.42	-1.8017	-0.6039	1.7912
STMN1	3	886	0.7273	0.73	-0.5829	-0.0256	0.8334
MAP3K7CL	1	887	0.7277	3.66	-0.1511	2.9104	4.5781
APOL4	1	888	0.7277	2.97	0.4868	2.9331	3.6581
PSG6	2	889	0.7277	1.59	0.4543	1.7146	1.8847
SKP1	2	890	0.7277	1.26	-1.8588	-0.7975	1.5871
ARMC7	1	891	0.7277	2.75	-3.4904	-1.0814	3.6024
FKBP11	3	892	0.728	0.6	0.2582	0.6777	0.6273
CTRL	3	893	0.728	0.43	-0.0222	0.2543	0.4134
EMC1	3	894	0.7281	0.91	-0.6579	0.0568	1.0688
SPRY2	2	895	0.7295	1.15	-1.5645	-0.6052	1.4346
ERCC6-PGBD3	3	896	0.7323	0.6	-0.4461	-0.0033	0.662
RAPH1	3	897	0.7323	0.69	-0.1827	0.3307	0.7677
DAZAP2	2	898	0.7323	3.07	0.1188	2.6587	3.7981
TERF1	2	899	0.7323	1.28	-1.9668	-0.8792	1.6264
EGR4	2	900	0.7323	1.13	-1.9974	-1.0363	1.4372
HSPA1A	3	901	0.7323	1.17	-0.5488	0.3908	1.4051
C6orf222	1	902	0.7323	3.88	0.7586	3.9768	4.8125
BTK	2	903	0.7323	2.24	0.854	2.6524	2.6893
C1QB	2	904	0.7323	3.77	0.3559	3.4887	4.6847
RFNG	2	905	0.7323	0.5	0.4725	0.7947	0.4817
WDR41	3	906	0.7323	1.85	-1.1413	0.4026	2.3087
DPF2	3	907	0.7323	0.5	0.4129	0.7344	0.4808
PNLDC1	3	908	0.7323	0.9	-1.724	-0.9765	1.1178
DNAJA2	1	909	0.7323	2.84	-0.4278	1.941	3.5423
NDUFB2	3	910	0.7323	0.61	-0.6523	-0.1946	0.6844
RPF2	2	911	0.7325	1.96	-3.3723	-1.6527	2.5714
ZNF175	2	912	0.7325	2.49	1.0362	3.0488	3.0096
EDC4	3	913	0.7325	2.28	0.3123	2.1667	2.773
RARS2	3	914	0.7325	1.53	-1.5595	-0.2762	1.919
ANK3	3	915	0.7325	2.69	0.6892	2.8869	3.2864
CHD9	1	916	0.7325	3.19	1.1716	3.7776	3.897
PCDHGA6	1	917	0.7325	3.81	-0.0373	3.1454	4.7594
RNF14	2	918	0.7325	0.58	0.1134	0.5192	0.6069
FAM122A	3	919	0.7345	1.07	-0.4751	0.3766	1.2737
RUSC1-AS1	3	920	0.7352	2.88	-0.0516	2.3372	3.5722
DRC7	2	921	0.7352	1.1	-0.8114	0.0739	1.3238
TMEM100	2	922	0.7352	0.61	-0.18	0.2616	0.6603
CERKL	1	923	0.7352	2.37	0.8046	2.7165	2.859
OR2T33	2	924	0.7352	0.73	-0.6943	-0.1301	0.8436
RER1	3	925	0.7352	0.64	0.5795	1.0151	0.6514
CCDC84	1	926	0.7352	0.05	-0.0347	-0.0823	-0.0712
DGKD	2	927	0.7352	2.28	1.3124	3.1293	2.7168
RBM8A	2	928	0.7352	0.09	-0.5323	-0.5266	0.0085
WIPI2	2	929	0.7352	0.33	0.3243	0.509	0.2762
NXT1	2	930	0.7352	1.55	-1.5434	-0.2379	1.9523
TAGLN3	3	931	0.7352	0.59	0.305	0.7133	0.6105
EIF3F	3	932	0.7352	0.77	-0.4952	0.0937	0.8807
CYP20A1	3	933	0.7352	0.94	-0.5257	0.2153	1.1081
POLR2F	2	934	0.7352	1.11	-1.3721	-0.4552	1.371
PRSS8	2	935	0.7352	2.42	1.2045	3.1444	2.901
METTL14	3	936	0.7352	0.8	-0.4951	0.1205	0.9207
FOXA3	2	937	0.7352	0.61	0.473	0.8874	0.6197
C17orf59	3	938	0.7352	0.75	-0.6662	-0.0861	0.8674
PLEKHF1	3	939	0.7352	0.21	-0.2118	-0.1119	0.1494
C19orf70	3	940	0.7352	0.32	-0.353	-0.154	0.2975
CHST11	1	941	0.7352	2.89	-0.2684	2.1325	3.5902
GGT1	2	942	0.7352	1.23	0.816	1.7516	1.3991
UNG	2	943	0.7352	0.85	-1.269	-0.5786	1.0325
HIST1H1E	3	944	0.7352	0.55	-0.2435	0.1466	0.5833
RNASE10	2	945	0.7352	1.11	1.356	2.172	1.2203
EIF5B	2	946	0.7352	0.97	-1.0568	-0.273	1.1721
PCBD2	1	947	0.7352	2.62	1.669	3.7643	3.1332
HDAC4	3	948	0.7352	0.42	0.785	1.0248	0.3587
CRYBB3	2	949	0.7352	1.29	1.0794	2.0545	1.4581
CYCS	2	950	0.7352	1.14	-1.3304	-0.3868	1.4109
CHN2	1	951	0.7352	1.93	1.2299	2.7477	2.2698
CXXC1	3	952	0.7352	0.98	0.7794	1.5004	1.0781
LY75	3	953	0.7352	0.3	0.962	1.0975	0.2026
KMT2B	3	954	0.7357	0.72	0.5201	1.0274	0.7587
PPIE	2	955	0.7357	1.29	-1.0848	-0.0274	1.5812
PPWD1	2	956	0.7357	1.19	-1.6403	-0.6459	1.4869
RPP21	2	957	0.7357	1.18	-1.7703	-0.7739	1.49
CCDC186	1	958	0.7357	2.34	0.981	2.8657	2.8183
A2ML1	2	959	0.7357	1.08	-1.4663	-0.5759	1.3314
NOP16	3	960	0.7388	0.74	-0.5836	-0.0179	0.846
IL34	1	961	0.739	2.3	0.2075	2.0845	2.8069
TLE2	1	962	0.74	2.33	-0.0058	1.9036	2.8553
NSMF	3	963	0.74	0.92	-0.6884	0.0355	1.0826
ADAM20	2	964	0.74	1.82	1.6607	3.0694	2.1065
UBE2D1	3	965	0.74	0.29	0.2024	0.356	0.2297
USP14	3	966	0.74	0.69	0.1755	0.6709	0.7407
FAM105A	2	967	0.74	2.26	0.6174	2.4452	2.7333
SNX20	2	968	0.74	2.02	0.9846	2.5959	2.4095
FPR3	3	969	0.74	0.85	1.0468	1.6429	0.8914
ARL14EP	2	970	0.74	0.87	-0.0243	0.634	0.9844
FAM89A	3	971	0.74	0.79	-1.1006	-0.4692	0.9442
DTD2	1	972	0.74	2.26	1.2064	3.0143	2.7035
IBA57	3	973	0.74	1.37	-1.3189	-0.1796	1.7037
MRPL4	3	974	0.74	1.38	-1.774	-0.6106	1.7397
PGK1	2	975	0.74	1.61	-1.5999	-0.2491	2.0199
DDX54	2	976	0.74	0.29	-0.9678	-0.7728	0.2916
OR4K5	2	977	0.74	2.67	0.8426	3.0183	3.2535
HES4	2	978	0.74	2.73	-0.1081	2.1505	3.3775
GS1-259H13.2	2	979	0.74	2.49	0.858	2.875	3.0161
PAQR3	3	980	0.74	1.56	-1.9549	-0.631	1.9797
C10orf91	3	981	0.74	0.64	0.8179	1.246	0.6402
SLC35G6	3	982	0.74	0.91	-0.8741	-0.1519	1.08
LOC441155	2	983	0.74	1.59	-1.6483	-0.3118	1.9985
HSPD1	1	984	0.74	2.62	-3.798	-1.4867	3.4562
P3H2	1	985	0.74	2.34	-0.2544	1.6799	2.8926
JMJD7-PLA2G4B	1	986	0.74	1.8	1.0665	2.4861	2.1229
SLC26A4	2	987	0.74	1.85	-0.5674	0.9573	2.28
EP400	3	988	0.74	1.15	-1.6729	-0.7111	1.4383
PPP1R37	3	989	0.74	0.73	0.3182	0.8455	0.7884
TMEM161A	2	990	0.7415	0.54	0.6155	0.9671	0.5258
SLC17A5	3	991	0.7419	0.97	0.0272	0.7665	1.1055
AHSP	2	992	0.7419	0.38	1.7486	1.92	0.2563
URI1	2	993	0.7424	0.59	-1.4275	-0.9564	0.7045
CD2BP2	3	994	0.7426	2.19	0.9994	2.7508	2.6189
AHSA2	3	995	0.7428	0.91	-1.0376	-0.3074	1.0919
PFN3	2	996	0.7428	0.88	1.0106	1.6371	0.9369
POP7	3	997	0.7428	1.23	-1.5377	-0.5107	1.5358
FRAT2	2	998	0.7447	0.82	-0.3624	0.2653	0.9387
C9orf9	2	999	0.7447	4.63	-0.1769	3.7152	5.8201
FTHL17	2	1000	0.7447	1.11	1.4124	2.2191	1.2063
C1QTNF9B-AS1	3	1001	0.7447	0.42	0.5269	0.7804	0.3791
RGMA	2	1002	0.7447	1.68	-0.4068	0.9611	2.0457
UQCR10	3	1003	0.7447	0.83	0.317	0.9308	0.9178
SLC35E2B	3	1004	0.7447	0.98	-1.1349	-0.34	1.1887
WDR74	1	1005	0.7447	3.11	-4.668	-1.9064	4.1296
URB1	2	1006	0.7447	1.68	-2.8806	-1.415	2.1916
RNF146	3	1007	0.7447	0.68	0.3592	0.8391	0.7177
PELP1	2	1008	0.7447	1.4	-1.4124	-0.2424	1.7496
PPFIA3	2	1009	0.7447	1.13	0.2978	1.17	1.3043
ATG14	1	1010	0.7447	4.44	0.5285	4.2285	5.533
NUP133	3	1011	0.7447	1.14	-1.6278	-0.674	1.4262
GNB2L1	1	1012	0.7447	1.58	-1.8029	-0.464	2.0021
EIF4ENIF1	2	1013	0.7447	0.99	-1.3634	-0.5486	1.2184
ZFP57	3	1014	0.7447	2.34	0.5044	2.4053	2.8426
RERE	3	1015	0.7447	1.88	-0.255	1.2811	2.2971
TNS3	3	1016	0.7447	0.83	-0.5494	0.091	0.9577
DBX1	1	1017	0.7447	3.73	0.4653	3.5659	4.6366
EWSR1	3	1018	0.7447	1.01	-0.8116	-0.0023	1.2102
MRPS17	3	1019	0.7447	0.53	1.058	1.3855	0.4898
SALL1	2	1020	0.7447	0.87	-1.1459	-0.4431	1.051
DPP10	1	1021	0.7452	1.6	2.1372	3.341	1.8002
CXCL14	1	1022	0.7452	1.83	0.2095	1.685	2.2065
AATF	2	1023	0.7452	2.18	-1.9726	-0.11	2.7853
TRIM49C	3	1024	0.7472	0.92	-0.277	0.4372	1.068
C16orf52	2	1025	0.7478	0.93	-0.4645	0.2604	1.0839
ZNF322	1	1026	0.7478	3.57	-0.2877	2.7043	4.4742
SLC17A7	3	1027	0.7478	1.33	0.8334	1.8536	1.5257
MYOG	3	1028	0.7478	0.62	0.0582	0.5034	0.6657
SRD5A1	1	1029	0.7478	1.55	1.303	2.4941	1.7811
M6PR	2	1030	0.7487	2.28	-0.0517	1.8204	2.7996
COLEC10	1	1031	0.7495	1.48	0.3254	1.4931	1.7461
RAB21	1	1032	0.7495	1.92	-0.3393	1.2356	2.3552
C1orf86	3	1033	0.7495	0.93	-0.8795	-0.1349	1.1135
ULK1	1	1034	0.7495	1.79	0.5523	1.9832	2.1398
ITGAV	3	1035	0.7501	0.59	0.1257	0.5367	0.6147
POC5	1	1036	0.7506	4.58	-0.0103	3.8307	5.7438
ANP32E	3	1037	0.7506	1	-0.7315	0.0631	1.1883
AK8	2	1038	0.7506	1.27	-1.9876	-0.9065	1.6168
SEMA4C	2	1039	0.7509	2.17	0.8878	2.6311	2.6069
CH25H	2	1040	0.7509	1.42	0.7396	1.8407	1.6466
C20orf27	3	1041	0.7515	0.76	-0.3481	0.2249	0.8569
PTPN12	1	1042	0.7515	1.85	0.8966	2.365	2.1959
COG3	3	1043	0.7515	0.87	-1.1627	-0.463	1.0463
ACSL3	1	1044	0.7515	1.97	-2.0211	-0.3404	2.5133
EMC7	2	1045	0.7515	4.01	-3.9215	-0.412	5.2481
WFDC10B	2	1046	0.7515	1.56	0.8766	2.0907	1.8155
NTN1	3	1047	0.7515	0.62	-0.2571	0.1963	0.6779
MYCT1	1	1048	0.7515	1.83	1.2966	2.7288	2.1417
CCNF	2	1049	0.7515	0.95	-0.8573	-0.1008	1.1311
CYBA	2	1050	0.7515	4.39	0.6622	4.3145	5.4616
MRPL36	3	1051	0.7515	0.42	0.3934	0.6535	0.389
ABCC3	3	1052	0.7515	0.99	-0.1064	0.6588	1.1443
PCDHAC2	1	1053	0.7515	1.62	1.4049	2.6493	1.8609
EID2B	3	1054	0.7515	0.77	0.1864	0.7531	0.8475
AKTIP	3	1055	0.7515	1.18	-1.9306	-0.9314	1.4942
SLC17A9	3	1056	0.7515	0.89	-1.0724	-0.3572	1.0695
PSME3	2	1057	0.7515	1.33	-1.642	-0.5276	1.6665
BHMT2	2	1058	0.7515	1.87	0.627	2.1229	2.237
IPO7	3	1059	0.7515	0.06	-0.2006	-0.2277	-0.0406
CBWD6	2	1060	0.7515	0.68	-0.4037	0.1033	0.7582
ANK2	1	1061	0.7515	2.54	0.2941	2.3793	3.1182
SAMM50	1	1062	0.7515	2.56	-3.8709	-1.6176	3.3695
TEAD4	2	1063	0.7515	0.44	-0.7152	-0.3966	0.4765
VSIG1	3	1064	0.7515	0.62	0.1826	0.6174	0.6502
ANKRD44	2	1065	0.7516	2.2	-0.216	1.5895	2.6999
PROZ	2	1066	0.7531	1.9	-0.4408	1.1165	2.3287
HEY1	3	1067	0.7531	1.05	-1.1518	-0.2979	1.2769
DDX10	2	1068	0.7531	1.84	-3.1139	-1.5014	2.4114
PARD6G	3	1069	0.7535	1.24	-0.0625	0.9159	1.463
GDAP1L1	1	1070	0.7536	1.63	1.0295	2.2985	1.8976
KCNH2	3	1071	0.7536	0.77	-0.2342	0.3497	0.8732
AHCY	3	1072	0.7536	0.44	-0.7835	-0.4681	0.4717
CA9	3	1073	0.7536	0.95	-0.2688	0.4691	1.1035
VPS18	3	1074	0.7536	0.57	0.2414	0.6358	0.5897
RAPGEF1	3	1075	0.7536	1.17	-1.0882	-0.1268	1.4375
GINS2	1	1076	0.7536	2.58	-3.743	-1.475	3.3914
ZNF554	3	1077	0.7536	0.61	0.491	0.9031	0.6161
TACC3	2	1078	0.7536	0.55	0.4548	0.8168	0.5412
RAB6C	1	1079	0.7536	2.46	0.8398	2.8351	2.9837
KLHDC7A	3	1080	0.7537	0.45	-0.3095	-0.0016	0.4605
BAG1	3	1081	0.7537	0.69	-0.2057	0.3012	0.7581
CCDC93	2	1082	0.7539	1.98	0.19	1.7943	2.3989
DHRS12	3	1083	0.7547	1.25	0.9682	1.9191	1.422
CSMD2	2	1084	0.7547	2.15	0.0618	1.821	2.6306
RAB40AL	1	1085	0.7547	1.55	1.0513	2.2562	1.8018
ZNF613	2	1086	0.7547	2.07	0.9516	2.6058	2.4736
MREG	3	1087	0.7547	1.16	-1.5876	-0.6211	1.4453
FDX1	3	1088	0.7547	1.05	-1.226	-0.3707	1.279
GOLGA6L6	3	1089	0.7547	1.11	-1.4844	-0.5657	1.3738
HK1	1	1090	0.7547	1.46	0.4824	1.6313	1.7181
C2orf83	3	1091	0.7547	1.17	-1.0623	-0.1104	1.4234
IFNA21	3	1092	0.7547	-0.03	0.3347	0.2046	-0.1944
FOXD4L6	2	1093	0.7547	1.45	-1.8204	-0.5961	1.8308
SLC13A2	2	1094	0.7547	0.58	0.119	0.5191	0.5983
SEMA6C	3	1095	0.7547	1.41	0.9372	2.02	1.6191
RNF167	3	1096	0.7547	0.81	-0.8568	-0.2204	0.9517
CTXN2	3	1097	0.7547	0.63	-0.6023	-0.1269	0.711
COL9A3	3	1098	0.7553	0.53	0.4709	0.8165	0.5168
NIPAL2	2	1099	0.7559	1.58	1.2639	2.4805	1.8193
ZNF646	2	1100	0.7575	2.12	-0.5693	1.1818	2.6186
SLC30A3	3	1101	0.759	0.94	-1.1449	-0.3864	1.1342
TSHZ1	1	1102	0.7596	1.34	1.2156	2.2293	1.5158
NCAPD2	2	1103	0.7596	0.37	-0.0898	0.1431	0.3483
TMEM71	2	1104	0.7596	0.48	0.6241	0.9236	0.4479
KLHDC4	2	1105	0.7597	2.08	0.0443	1.7369	2.5311
MPV17L2	3	1106	0.7597	0.6	0.4786	0.8842	0.6064
HTR6	3	1107	0.7597	1	-2.1342	-1.2854	1.2693
AGPAT5	1	1108	0.7597	3.08	0.4453	2.9884	3.8029
ZNF202	1	1109	0.7597	2.42	-1.9261	0.1352	3.0824
SMCO1	1	1110	0.7597	1.69	0.3929	1.7429	2.0188
HGS	3	1111	0.7597	0.54	-0.7726	-0.3692	0.6032
SLC4A9	3	1112	0.7597	0.79	-0.6679	-0.0561	0.9149
CMTM1	2	1113	0.7597	0.53	0.9883	1.3155	0.4893
NPIPB9	1	1114	0.7597	2.69	-4.0129	-1.6368	3.5532
CGN	2	1115	0.7597	0.65	0.8732	1.3046	0.6451
CHRNA10	2	1116	0.7597	2.02	0.5523	2.1754	2.4272
NKTR	2	1117	0.7597	0.71	-1.0145	-0.4541	0.838
DCTN5	1	1118	0.7616	2.43	-3.3709	-1.2465	3.1768
ADGRL3	3	1119	0.763	2.99	-0.0287	2.4518	3.7093
SCUBE1	1	1120	0.763	2.35	0.3949	2.3093	2.8628
KLK14	3	1121	0.763	0.93	-0.8337	-0.0907	1.1112
TMEM178A	2	1122	0.7635	1.37	-1.0417	0.0888	1.6905
PEA15	2	1123	0.7635	1.02	-0.9913	-0.1674	1.232
LY96	1	1124	0.7635	1.39	0.8645	1.9389	1.6066
IQCG	3	1125	0.7635	1.28	-1.341	-0.2827	1.5825
TRIM50	2	1126	0.7635	0.31	1.4767	1.601	0.1858
CEP57	2	1127	0.7674	-0.02	0.028	-0.0786	-0.1594
LIPA	2	1128	0.7676	2.17	0.4575	2.212	2.6237
DTX2	1	1129	0.7676	2.1	0.8984	2.5811	2.5163
SAMD12	1	1130	0.7676	1.27	0.3378	1.3269	1.479
DNAJC27	2	1131	0.7676	0.67	0.764	1.2173	0.6778
MYO1B	3	1132	0.7676	1.02	-1.2072	-0.3718	1.2492
RINT1	3	1133	0.7676	1	-2.2374	-1.3763	1.2876
CA2	2	1134	0.7676	1.65	0.8048	2.1054	1.945
LSM5	2	1135	0.7676	0.95	-0.8411	-0.0844	1.1315
AIM1	3	1136	0.7676	0.26	-0.0841	0.0536	0.206
PPIG	1	1137	0.7676	3.12	0.13	2.7188	3.8713
NCR3	1	1138	0.7676	2	1.1811	2.7636	2.3665
DCLRE1C	1	1139	0.769	2.11	0.4647	2.1686	2.5481
FAM171A2	2	1140	0.7694	1.31	0.109	1.1394	1.5409
CHAC2	1	1141	0.7694	2.15	1.5271	3.2231	2.5362
EXOSC5	2	1142	0.7694	1.28	-1.3129	-0.2505	1.5887
VSIG10L	1	1143	0.7697	1.94	0.2217	1.786	2.3392
ZC3H7A	3	1144	0.7697	0.76	-1.1883	-0.5822	0.9063
ZNF789	2	1145	0.7697	1.48	-1.9079	-0.6528	1.8768
RRAGD	1	1146	0.7697	2.02	0.3846	2.0123	2.4339
PSG8	2	1147	0.7697	0.92	-1.7998	-1.0297	1.1515
SPESP1	1	1148	0.7697	1.74	0.5314	1.9143	2.0679
KLF2	3	1149	0.7697	0.87	-0.963	-0.2656	1.0429
MOGS	3	1150	0.7697	0.67	-0.7406	-0.2243	0.772
CPSF3L	1	1151	0.7697	2.6	-3.9035	-1.6086	3.4319
SPINK8	2	1152	0.7697	0.85	0.6196	1.2336	0.9181
ANAPC2	2	1153	0.7704	0.98	0.4327	1.1665	1.0973
SHBG	3	1154	0.7705	0.84	-0.4493	0.2007	0.972
SERINC1	1	1155	0.7705	1.63	0.0654	1.374	1.957
CD300LF	2	1156	0.7706	2.1	0.2549	1.9559	2.5437
ARPC3	2	1157	0.7706	0.74	-1.5711	-0.9656	0.9054
PRKRIP1	2	1158	0.7706	0.95	-0.4398	0.3	1.1062
RPA2	3	1159	0.7706	0.8	-1.1569	-0.5102	0.967
CNTN3	2	1160	0.7706	0.81	-0.2748	0.3421	0.9225
RNF114	3	1161	0.7706	0.55	-0.3858	0.0112	0.5938
TRIM54	3	1162	0.7706	0.58	0.0452	0.4541	0.6114
SEMA4B	3	1163	0.7706	0.4	0.0205	0.2723	0.3766
RSPH10B2	3	1164	0.7706	0.85	-1.3778	-0.6867	1.0336
RBMY1F	1	1165	0.7706	1.95	0.307	1.8795	2.3515
ARHGAP30	2	1166	0.7706	2.07	-0.052	1.637	2.5257
VPS13D	1	1167	0.772	1.94	-0.8883	0.7194	2.4042
KAT2A	3	1168	0.772	1.05	-0.0814	0.7385	1.2261
TEKT2	2	1169	0.7727	2.64	0.5735	2.7301	3.2249
RCL1	3	1170	0.7727	1.05	-1.4006	-0.5358	1.2933
RHOBTB3	2	1171	0.774	1.73	1.3231	2.672	2.0172
PLRG1	2	1172	0.7745	1.18	-1.841	-0.8494	1.4828
U2SURP	2	1173	0.7745	1.11	-2.1775	-1.2253	1.4239
TBC1D5	2	1174	0.7745	0.48	-0.5776	-0.2309	0.5184
KMT2D	3	1175	0.7745	0.44	0.484	0.7495	0.3971
CHGA	1	1176	0.7745	1.69	0.613	1.9507	2.0004
SPC24	1	1177	0.7745	2.53	-3.9495	-1.712	3.346
CRLS1	3	1178	0.7747	0.61	0.1156	0.543	0.6392
SERP2	3	1179	0.7747	0.37	-0.4407	-0.1993	0.361
EIF2A	2	1180	0.7747	2.19	-1.4879	0.3586	2.7612
APOO	3	1181	0.7747	0.93	-1.2669	-0.5126	1.1278
RPA1	3	1182	0.7747	0.52	-0.4942	-0.1204	0.5591
PLA2G15	3	1183	0.7747	1.86	0.3279	1.8194	2.2304
TTC9	3	1184	0.7747	0.84	0.3306	0.9487	0.9243
FAM78A	3	1185	0.7747	0.76	0.3987	0.944	0.8153
MCM7	1	1186	0.7747	3.06	-4.9082	-2.1857	4.0711
CD300LG	3	1187	0.7747	0.96	-1.69	-0.8887	1.1983
SOSTDC1	1	1188	0.7747	3.39	1.1199	3.8981	4.1545
SPATA20	3	1189	0.7747	0.7	-1.0302	-0.4764	0.8282
RCOR1	3	1190	0.7747	1.21	0.4612	1.394	1.3948
LMAN1L	3	1191	0.7747	1.03	-1.1663	-0.3245	1.2588
VPS29	1	1192	0.7747	1.94	-2.3295	-0.6638	2.4909
MBTPS2	2	1193	0.7747	1.03	-1.1618	-0.3226	1.2549
FTO	2	1194	0.7747	1.42	-2.0947	-0.884	1.8104
LGALS4	2	1195	0.7747	2.27	0.0556	1.916	2.782
TSPAN31	2	1196	0.7747	2.08	0.0362	1.7316	2.5352
SEPSECS	1	1197	0.7747	1.17	-0.9767	-0.0263	1.4213
SNX32	3	1198	0.7747	1.54	-0.0621	1.1768	1.8526
HDHD2	3	1199	0.7747	0.77	-1.7483	-1.1101	0.9544
GPR137	3	1200	0.7747	0.66	-1.2815	-0.7503	0.7942
BRD7	2	1201	0.7747	1	0.3475	1.1028	1.1294
GORAB	1	1202	0.7747	1.72	0.7414	2.1027	2.0356
HBS1L	3	1203	0.7747	0.69	0.0738	0.5752	0.7499
ZNF595	2	1204	0.7752	1.47	0.7537	1.8947	1.7062
NLGN2	2	1205	0.7752	1.22	0.3957	1.342	1.4151
PDCL3	2	1206	0.7752	1.67	0.557	1.8783	1.9758
ATP5A1	3	1207	0.7754	0.89	-1.2865	-0.5617	1.0839
COMMD6	1	1208	0.7773	1.95	1.0503	2.5927	2.3065
PSMB4	1	1209	0.7773	2.31	-3.3675	-1.345	3.0245
BSG	3	1210	0.7773	0.77	-0.0752	0.5019	0.863
FAM98C	3	1211	0.7773	1.05	-1.2889	-0.4299	1.2845
PLCXD1	1	1212	0.7773	2.01	0.392	2.0169	2.4299
TRIM11	2	1213	0.7773	1.18	-2.2791	-1.2694	1.5099
ISLR	2	1214	0.7773	2.53	0.0174	2.0992	3.113
ORAI2	3	1215	0.7773	0.76	1.2728	1.7864	0.768
ZNF292	2	1216	0.7778	1.06	1.3839	2.1514	1.1477
CD1E	3	1217	0.7778	2.13	-0.41	1.342	2.6199
ACAP2	2	1218	0.7778	3.78	0.3166	3.4593	4.6995
OAS1	2	1219	0.7778	0.11	-0.5035	-0.4773	0.0392
NME3	3	1220	0.7778	1.31	-2.3854	-1.2554	1.6898
FAF2	3	1221	0.7778	0.51	-0.2722	0.0895	0.5409
AP2S1	2	1222	0.7778	1.96	-1.8372	-0.1717	2.4905
MCM6	1	1223	0.7778	0.34	-0.4142	-0.1985	0.3225
TRRAP	1	1224	0.7778	2.13	-2.8516	-1.0065	2.7592
GNAO1	2	1225	0.7784	3.53	0.4846	3.4073	4.3705
EIF6	2	1226	0.7789	1.02	-1.4365	-0.5968	1.2556
MKNK1	2	1227	0.7789	2.13	-0.3656	1.3874	2.6214
ZNF705D	2	1228	0.7799	1.44	0.7454	1.8615	1.669
FSHR	3	1229	0.7799	0.9	-1.1156	-0.3924	1.0815
FOLH1	1	1230	0.7799	1.93	-1.4913	0.1365	2.4341
DAP3	2	1231	0.7805	1.06	-1.9445	-1.0459	1.3437
COL5A1	2	1232	0.7805	0.54	0.9088	1.2455	0.5035
PMPCB	2	1233	0.7805	0.91	-0.7225	-0.0016	1.0781
FAM175A	1	1234	0.7808	1.28	1.3316	2.2889	1.4315
ST20-MTHFS	2	1235	0.7808	0.8	0.0588	0.6533	0.8889
PRR20D	3	1236	0.7808	0.75	-0.8183	-0.2312	0.878
SPACA5	1	1237	0.7808	2.4	1.3272	3.2443	2.8667
LIPT2	3	1238	0.7808	1.19	-1.6639	-0.6629	1.4969
RIPK1	3	1239	0.7808	0.42	0.6863	0.9325	0.3682
GSTA2	1	1240	0.7808	1.47	0.923	2.0635	1.7055
ARPC1B	3	1241	0.7808	1.06	-1.3193	-0.4453	1.3069
PIGG	2	1242	0.7808	0.24	0.2074	0.3123	0.1568
RHEB	3	1243	0.7808	0.34	-0.2056	0.0051	0.315
ASPM	2	1244	0.7808	1.53	-2.1108	-0.8078	1.9485
CASC3	2	1245	0.7808	1.92	0.0569	1.613	2.327
PDCD7	2	1246	0.7808	1.57	-3.1845	-1.8033	2.0655
PNMAL1	2	1247	0.7808	1.67	-0.5365	0.828	2.0405
NR5A1	2	1248	0.7808	0.15	0.7952	0.808	0.019
NUP153	2	1249	0.7808	0.84	-0.8668	-0.2023	0.9936
CCDC113	3	1250	0.781	0.88	-1.4815	-0.7608	1.0779
FOXA2	2	1251	0.7835	1.81	0.9107	2.3448	2.1445
NKX1-2	3	1252	0.7841	0.66	-0.9608	-0.4476	0.7674
CX3CR1	3	1253	0.7841	2.77	-0.0674	2.2249	3.4278
SAP30	3	1254	0.7841	1.23	-0.6773	0.314	1.4823
EQTN	1	1255	0.7842	1.6	-0.338	0.9595	1.9402
SCN11A	2	1256	0.7843	1.1	-1.571	-0.6539	1.3714
KIAA1324	2	1257	0.7844	0.64	1.0591	1.476	0.6235
CHMP2B	2	1258	0.7844	1.07	1.4736	2.2433	1.151
CTCF	2	1259	0.7849	1.01	-1.1362	-0.3133	1.2305
KRTAP4-2	3	1260	0.7849	0.6	0.48	0.8879	0.61
NTMT1	2	1261	0.7849	0.29	0.3444	0.4948	0.2249
EPB41	3	1262	0.7849	0.81	-1.2225	-0.5697	0.9762
TNFAIP8L2-SCNM1	3	1263	0.7849	0.81	-0.9979	-0.3538	0.9632
CCR5	2	1264	0.7851	2.93	0.6523	3.0517	3.588
PNRC2	3	1265	0.7857	0.61	-1.4527	-0.9589	0.7385
OR10H4	2	1266	0.7857	2.15	-0.7449	1.0378	2.6657
HERC6	2	1267	0.7867	1.33	0.9204	1.9378	1.5215
PRR30	1	1268	0.7867	2.19	0.6145	2.379	2.6387
NOS3	1	1269	0.7872	1.8	0.7542	2.1845	2.1389
C16orf70	3	1270	0.7872	0.48	0.955	1.2419	0.4291
TGFB1I1	3	1271	0.7872	0.22	0.8268	0.8985	0.1071
POT1	2	1272	0.7872	1.34	-0.6607	0.4242	1.6224
KRTAP5-5	1	1273	0.7872	1.22	0.8825	1.8109	1.3883
SLC1A6	2	1274	0.7885	0.32	-0.3061	-0.1061	0.299
SLC16A2	2	1275	0.7885	1.59	1.2745	2.5017	1.8351
KBTBD11	1	1276	0.7891	1.4	1.2348	2.3024	1.5965
PRG4	2	1277	0.7891	2.78	-1.0188	1.3215	3.4996
GUCD1	2	1278	0.7891	1.78	1.5324	2.9141	2.0662
ZNF7	2	1279	0.7891	0.15	0.999	1.0006	0.0024
SV2A	2	1280	0.7891	-0.08	1.5134	1.2954	-0.3259
NAA25	3	1281	0.7909	0.91	-0.9419	-0.2143	1.088
TINAG	1	1282	0.7909	1.07	1.6972	2.4651	1.1482
ZP3	3	1283	0.7909	0.58	-0.3045	0.1197	0.6344
MIOS	2	1284	0.7909	0.74	-1.1351	-0.5468	0.8798
RRAGA	2	1285	0.791	0.5	0.1632	0.4965	0.4984
TP53BP1	2	1286	0.791	1.95	0.3383	1.9139	2.3561
TRIM16L	3	1287	0.791	0.52	0.0929	0.449	0.5325
ATP5E	3	1288	0.791	0.95	-0.5116	0.2387	1.122
CCDC74B	2	1289	0.791	0.13	0.6895	0.6888	-0.0011
GDAP2	2	1290	0.791	1.41	-2.356	-1.1421	1.8152
EIF4B	3	1291	0.791	0.95	-0.4371	0.3057	1.1107
SSBP4	2	1292	0.7913	0.47	-1.1922	-0.8326	0.5377
BTNL9	1	1293	0.7924	2.1	1.4612	3.1225	2.4843
LDLR	2	1294	0.7924	0.47	0.2785	0.5803	0.4514
CNTROB	1	1295	0.7934	1.72	0.0735	1.4617	2.076
CWC15	3	1296	0.7949	1.06	-0.836	0.018	1.277
DEGS2	1	1297	0.7949	1.96	0.2117	1.7981	2.3723
PRKAB1	3	1298	0.7949	1.58	1.2472	2.4626	1.8176
TGIF2-C20orf24	1	1299	0.7955	3.06	-0.2177	2.3332	3.8145
HIST1H2BH	2	1300	0.7955	0.01	0.6819	0.5762	-0.158
LRFN2	3	1301	0.7955	1.24	0.8322	1.776	1.4113
CABP2	1	1302	0.7955	1.24	0.9535	1.8888	1.3986
PARP12	2	1303	0.7955	1.26	-1.5635	-0.5136	1.5699
ZW10	2	1304	0.7955	1.97	-2.0088	-0.3285	2.5127
MPO	1	1305	0.7955	1.68	1.4322	2.7297	1.9403
CUL2	1	1306	0.7955	2.08	-3.0674	-1.2533	2.7126
NDUFAF7	2	1307	0.7955	1.91	-1.3683	0.2348	2.3973
SSU72	2	1308	0.7955	1.16	-1.9082	-0.9234	1.4726
PRPF39	3	1309	0.7955	0.34	0.5663	0.7495	0.274
PDE4C	2	1310	0.7955	0.45	-0.4273	-0.1115	0.4723
ZNF705G	3	1311	0.7955	-0.09	0.1924	0.0209	-0.2564
LSM4	2	1312	0.7955	1.28	-2.1582	-1.0668	1.632
FAM73B	2	1313	0.7955	0.35	1.3823	1.5416	0.2382
RNF6	2	1314	0.7955	1.26	0.398	1.3763	1.4629
LSM6	2	1315	0.7955	1.05	-1.8145	-0.9313	1.3206
SECISBP2	1	1316	0.7955	1.39	-0.0401	1.0695	1.6594
TMEM79	2	1317	0.7955	1.61	-2.7075	-1.3046	2.0978
UBE2S	2	1318	0.7955	1.09	-1.9961	-1.0768	1.3747
OSBP2	2	1319	0.7955	0.74	1.2551	1.752	0.743
BCL2A1	2	1320	0.7955	1.51	0.8545	2.0283	1.7553
NFKBIA	2	1321	0.7955	1.26	1.1548	2.1039	1.4193
BCOR	2	1322	0.7955	1.95	-0.0874	1.5017	2.3764
SLC36A4	3	1323	0.7955	0.92	0.0376	0.7355	1.0435
CAV2	2	1324	0.7955	0.52	0.3127	0.6544	0.5109
EGLN1	2	1325	0.7955	0.95	-1.467	-0.6808	1.1756
DYDC2	3	1326	0.7955	1.57	1.4196	2.6269	1.8054
ADCY6	2	1327	0.7955	0.12	-0.044	-0.0293	0.022
PNPT1	2	1328	0.7955	1.44	-2.3262	-1.0846	1.8567
RBM42	3	1329	0.7955	0.89	-0.5873	0.1082	1.04
C15orf40	2	1330	0.7955	1.49	0.6019	1.7682	1.7442
CHRNA7	3	1331	0.7955	0.79	0.9827	1.5336	0.8238
KRTAP5-6	3	1332	0.7955	0.42	0.9561	1.1911	0.3515
MRPL9	2	1333	0.7955	2.44	0.5227	2.5125	2.9754
DNALI1	2	1334	0.7955	1.03	1.1043	1.8533	1.1201
CAMSAP1	3	1335	0.7955	0.03	1.1915	1.0851	-0.1591
CHSY1	1	1336	0.7955	2.06	1.0242	2.6634	2.4511
TRIM44	3	1337	0.797	1.17	-1.6084	-0.6284	1.4654
GTF2H2C	2	1338	0.7974	1.22	-1.8641	-0.8301	1.5462
OR2C3	2	1339	0.7974	2	0.2975	1.9174	2.4225
MAP2K1	1	1340	0.7974	2.98	-4.597	-1.954	3.9523
FAM120B	2	1341	0.7974	2.18	-0.2625	1.529	2.6789
TFEC	1	1342	0.7974	1.01	0.4233	1.1878	1.1431
FBXO15	2	1343	0.7979	1.31	0.7714	1.7802	1.5086
TLR3	2	1344	0.7979	1.12	-1.2113	-0.2925	1.374
NDUFB4	2	1345	0.7979	0.7	-0.2522	0.2712	0.7827
PRKD2	3	1346	0.7979	0.07	1.0642	0.9942	-0.1047
FLOT1	2	1347	0.7984	0.84	-0.1138	0.5194	0.9469
CDK5RAP3	2	1348	0.7984	2.75	-0.4008	1.883	3.4151
PPP1R15B	2	1349	0.7984	2.53	-1.5784	0.5618	3.2004
DIS3	2	1350	0.7984	1.58	-2.9302	-1.5509	2.0626
USF1	3	1351	0.7984	0.73	0.5591	1.0737	0.7695
MYDGF	1	1352	0.7984	1.98	-0.1625	1.4561	2.4204
HSD17B10	1	1353	0.7984	1.88	-2.1067	-0.5011	2.401
BCO2	1	1354	0.7984	1.53	0.4678	1.6745	1.8045
LILRB4	2	1355	0.7984	1.25	1.1327	2.0732	1.4064
RB1CC1	3	1356	0.7984	1.25	-0.5537	0.4505	1.5017
FABP2	2	1357	0.7984	0.81	-0.1657	0.4501	0.9208
ZMAT5	1	1358	0.799	0.87	0.3796	1.0188	0.9558
DDHD1	3	1359	0.7993	-0.01	0.1592	0.0513	-0.1614
HCAR2	1	1360	0.7993	1.29	1.2912	2.2613	1.4507
ZBTB17	2	1361	0.7993	-0.27	0.257	-0.0724	-0.4926
TUBB	1	1362	0.7993	2.45	-3.9038	-1.7384	3.2382
CAPN15	2	1363	0.7993	0.06	0.4921	0.4342	-0.0865
RNPEP	3	1364	0.7993	0.27	-0.0837	0.0578	0.2116
RFWD3	2	1365	0.7998	0.35	-0.2808	-0.059	0.3316
NTRK1	1	1366	0.7998	1.63	1.0875	2.3542	1.8943
C1QTNF4	2	1367	0.7998	0.69	-0.7098	-0.1793	0.7934
NME4	2	1368	0.7998	0.58	0.9279	1.3042	0.5628
A3GALT2	3	1369	0.7998	0.9	0.8508	1.5009	0.9722
RMI2	2	1370	0.7998	0.29	1.1785	1.2915	0.1689
LDB2	1	1371	0.7998	2.58	0.3074	2.4235	3.1644
BAZ1A	3	1372	0.7998	0.73	-0.4156	0.1394	0.8299
THOC7	2	1373	0.7998	1.28	-2.1038	-1.0172	1.6248
PARG	2	1374	0.7998	0.59	-0.6675	-0.2264	0.6596
AXIN1	2	1375	0.7998	0.26	0.2762	0.4002	0.1854
STRN4	2	1376	0.7998	1.22	-1.2898	-0.2811	1.5085
INTS10	1	1377	0.7998	1.5	-0.6789	0.5428	1.827
COL22A1	2	1378	0.7998	0.45	0.164	0.4558	0.4364
BMP5	3	1379	0.7998	1.45	1.1532	2.2651	1.6627
CSRP2BP	3	1380	0.7998	1.1	0.1075	0.9587	1.2728
C21orf2	2	1381	0.7998	1.02	-0.2375	0.5621	1.1957
HOXB9	1	1382	0.7998	1.65	-0.0828	1.2452	1.9859
CHCHD2	3	1383	0.7998	1.45	0.0631	1.2162	1.7243
NBPF10	2	1384	0.7998	0.49	-0.5999	-0.2454	0.5301
ACTA2	3	1385	0.7998	0.74	-0.47	0.0903	0.8378
KIF26B	2	1386	0.7998	0.98	-0.1687	0.5922	1.1379
RXFP3	2	1387	0.7998	1	0.2941	1.053	1.1349
SOAT2	3	1388	0.7998	0.87	0.4096	1.0508	0.9589
GABRA6	2	1389	0.7998	1.05	1.6229	2.3751	1.1248
GCFC2	3	1390	0.7998	0.61	-0.4062	0.0425	0.671
PQLC3	2	1391	0.7998	1.76	-0.8621	0.5933	2.1763
SLC50A1	3	1392	0.7998	0.41	-0.6358	-0.3456	0.434
CCDC130	3	1393	0.7998	0.74	-1.0432	-0.4559	0.8782
ZNF771	3	1394	0.7998	0.68	0.3629	0.8398	0.7131
CCDC178	2	1395	0.7998	2.19	-0.0511	1.7405	2.679
DCLRE1A	3	1396	0.7998	0.19	-0.2797	-0.1918	0.1316
NUDT13	2	1397	0.7998	0.69	-1.4562	-0.8941	0.8405
MBD3L3	2	1398	0.7998	2.07	0.5243	2.1958	2.4995
RNF13	2	1399	0.7998	1.88	-0.3916	1.1522	2.3086
DCPS	2	1400	0.7998	1.03	-1.8121	-0.9461	1.2949
DGCR14	2	1401	0.7998	1.59	-1.5451	-0.2127	1.9924
RASGRP4	3	1402	0.7998	1.89	-0.0268	1.5062	2.2925
DPH2	2	1403	0.7998	1.6	-2.2215	-0.8473	2.055
CCAR2	1	1404	0.7998	2.79	-0.0158	2.2933	3.4531
PLAC8L1	3	1405	0.7998	1.08	1.033	1.8323	1.1953
LPA	2	1406	0.7998	0.21	0.0863	0.1759	0.1341
ANO9	2	1407	0.7998	0.25	1.1463	1.2265	0.12
GNB4	2	1408	0.7998	1.55	0.36	1.5847	1.8314
FPR1	2	1409	0.7998	2.26	0.2407	2.0864	2.7601
NIP7	2	1410	0.7998	1.37	-1.4757	-0.3303	1.7127
DCAF11	1	1411	0.7998	1.02	1.4444	2.1746	1.0919
CTTNBP2	2	1412	0.7998	0.4	-0.122	0.133	0.3814
NPM1	2	1413	0.7998	2.34	-2.8373	-0.803	3.0421
CYB5R4	2	1414	0.7998	0.72	-0.5172	0.0283	0.8157
TCEB2	2	1415	0.7998	1.42	-1.9721	-0.7653	1.8047
USB1	1	1416	0.7998	1.68	0.202	1.5438	2.0065
DGKZ	3	1417	0.7998	0.59	0.7356	1.1209	0.5761
R3HDM1	1	1418	0.7998	1.3	0.331	1.3412	1.5106
KIAA0753	3	1419	0.7998	-0.14	0.4944	0.2659	-0.3417
CCBL1	2	1420	0.7998	-0.09	0.3239	0.1467	-0.265
SDC3	2	1421	0.8005	0.56	0.4611	0.837	0.5621
SH2D4A	1	1422	0.8008	0.86	0.3451	0.981	0.9508
MRPS21	2	1423	0.8008	1.3	-1.6864	-0.5964	1.6299
SPANXA1	2	1424	0.8008	1.11	1.2253	2.0454	1.2263
OR4S2	3	1425	0.8008	0.47	0.3724	0.6684	0.4425
ZNF507	2	1426	0.8009	0.45	0.5301	0.8051	0.4112
HIP1R	2	1427	0.8009	1.69	0.622	1.9641	2.007
KRTAP5-10	2	1428	0.8009	0.49	0.5063	0.8203	0.4696
ACAP3	2	1429	0.8014	0.65	0.0994	0.5653	0.6967
RNF103	3	1430	0.8014	0.64	0.1673	0.6184	0.6745
KCNJ12	3	1431	0.8014	-0.15	1.267	0.9966	-0.4044
OR1L4	3	1432	0.8014	1.81	-0.1776	1.2951	2.2022
FAM127C	2	1433	0.8017	2	-0.1095	1.5269	2.4471
STX1A	1	1434	0.8018	0.87	0.1027	0.761	0.9844
FUZ	3	1435	0.8018	0.65	0.22	0.6823	0.6913
CFAP20	1	1436	0.8018	0.69	-0.8108	-0.2768	0.7985
TROVE2	3	1437	0.8018	0.84	-0.2581	0.3882	0.9665
GRHL3	2	1438	0.8018	0.61	-0.1895	0.2538	0.663
DOPEY2	2	1439	0.8018	0.6	-0.9923	-0.5328	0.6872
DCX	1	1440	0.8018	0.86	1.8467	2.4237	0.8628
AMY2A	3	1441	0.8018	1.2	-1.5008	-0.5015	1.4943
CNIH4	1	1442	0.8018	1.98	1.9004	3.4383	2.2998
TMEM184A	2	1443	0.8018	1.18	1.1182	1.9953	1.3115
PLA2G4F	2	1444	0.8018	1.46	0.3811	1.529	1.7166
EXOC2	3	1445	0.8018	0.87	-1.2824	-0.5773	1.0545
RALYL	1	1446	0.8018	1.22	0.3717	1.3186	1.416
LOC100129216	1	1447	0.8018	1.87	0.1914	1.7049	2.2632
KIF12	3	1448	0.8018	0.62	0.2492	0.6836	0.6497
NDUFS5	3	1449	0.8018	0.85	-0.2518	0.3954	0.9679
ADPGK	2	1450	0.8018	-0.3	0.2227	-0.1338	-0.5331
C11orf96	3	1451	0.8018	0.73	0.4621	0.9831	0.7791
MOB3B	1	1452	0.8018	1.93	0.8069	2.3472	2.3033
ASB15	3	1453	0.8018	1.03	1.3685	2.1134	1.1139
CDS2	2	1454	0.8018	0.9	-1.2605	-0.5281	1.0953
TLK1	3	1455	0.8018	0.35	0.3167	0.5192	0.3029
HIST1H2AD	3	1456	0.8018	0.55	0.0658	0.4419	0.5625
PTPMT1	2	1457	0.8031	1.41	-2.6414	-1.4164	1.8319
KLF17	2	1458	0.8031	1.9	1.8411	3.3085	2.1944
MRPL49	2	1459	0.8033	0.92	-0.9888	-0.2455	1.1115
DHRS9	1	1460	0.8033	1.08	1.3226	2.1058	1.1712
ZNF711	2	1461	0.8033	-0.04	-0.2284	-0.3442	-0.1731
CEBPE	3	1462	0.8036	-0.13	0.7009	0.4702	-0.3449
MTIF2	2	1463	0.8036	1.26	-1.0269	0.0081	1.5479
DCTN6	1	1464	0.8036	2.65	-4.3343	-1.9833	3.5157
ZNF735	2	1465	0.8036	2.77	0.4063	2.6825	3.4038
ADAMTS18	2	1466	0.8036	1.71	1.2334	2.5676	1.9952
EXOC3	2	1467	0.8036	0.66	-0.78	-0.276	0.7538
C10orf113	2	1468	0.8036	1.37	1.2563	2.2928	1.55
PFDN5	2	1469	0.8036	0.81	-0.516	0.1115	0.9384
NMRK1	1	1470	0.8039	1.29	1.0547	2.0337	1.4641
COQ9	3	1471	0.8041	0.45	0.159	0.4538	0.4408
SLC10A4	3	1472	0.8064	0.43	0.852	1.0964	0.3655
EDN3	2	1473	0.8064	1.49	0.9872	2.1418	1.7265
KRT25	2	1474	0.8064	0.67	-0.1556	0.3368	0.7363
OR52J3	1	1475	0.8072	1.54	1.7632	2.9288	1.743
KCNN4	2	1476	0.8078	0.3	-0.6022	-0.4143	0.281
TMEM255B	3	1477	0.8078	0.26	0.7241	0.8271	0.154
VPS37C	2	1478	0.8078	0.87	-0.5918	0.0899	1.0194
ASB18	2	1479	0.8078	0.99	0.2832	1.0305	1.1175
THPO	1	1480	0.8078	0.87	0.614	1.2448	0.9433
AVP	3	1481	0.8078	0.77	-0.529	0.0671	0.8914
MSI1	1	1482	0.8078	1.44	0.4575	1.5853	1.6865
SART3	2	1483	0.8078	0.91	-1.4968	-0.7499	1.1169
PAGR1	3	1484	0.8078	0.86	1.1419	1.7483	0.9067
MITD1	1	1485	0.8078	0.85	1.2152	1.8073	0.8853
OXSM	2	1486	0.8078	0.8	-0.0053	0.5904	0.8909
PPP2CA	1	1487	0.8078	1.64	-2.7546	-1.3272	2.1345
USP53	1	1488	0.8078	1.17	0.6956	1.5822	1.3258
P3H4	1	1489	0.8078	0.86	0.8087	1.431	0.9305
OR4F3	3	1490	0.8078	0.82	-0.5511	0.0864	0.9532
WFDC5	1	1491	0.8078	0.88	0.6511	1.2942	0.9618
ADAMTS8	1	1492	0.8078	1.08	1.0259	1.8284	1.2
DLX4	1	1493	0.8129	1.48	0.9098	2.0565	1.7148
TMEM236	3	1494	0.8129	0.79	-1.0894	-0.4624	0.9377
CSAG3	3	1495	0.8129	0.86	-0.9874	-0.3	1.0279
TREH	2	1496	0.8129	0.32	-0.4744	-0.2673	0.3097
KANSL3	3	1497	0.8129	0.87	-1.0119	-0.315	1.0422
HILPDA	2	1498	0.8129	0.43	0.7092	0.9638	0.3808
RASA4	3	1499	0.8142	0.17	0.7415	0.7733	0.0475
USP48	1	1500	0.8161	1.27	1.0732	2.03	1.4308
CNGB1	3	1501	0.8161	0.47	0.7137	1.004	0.4341
KLC1	2	1502	0.8163	1.04	1.7499	2.4834	1.0969
GSG1	2	1503	0.8163	0.45	0.0177	0.3154	0.4452
CLTC	1	1504	0.8163	2.01	-2.7174	-0.9793	2.599
RNF26	1	1505	0.8163	1.75	1.2333	2.5973	2.0396
C9orf131	2	1506	0.8163	0.03	-0.2707	-0.3241	-0.0799
UTS2R	3	1507	0.8163	1.83	1.6826	3.1022	2.123
CENPA	2	1508	0.8163	1.49	-3.3089	-1.9964	1.9627
PSMD4	2	1509	0.8163	0.66	-0.4661	0.0329	0.7462
LRRC8E	1	1510	0.8163	2.08	0.6162	2.2898	2.5026
ZNF701	3	1511	0.8163	0.81	0.1173	0.7202	0.9015
PARS2	3	1512	0.8163	0.47	0.3977	0.6931	0.4418
TMUB2	2	1513	0.8163	0.65	0.2381	0.694	0.6818
OR3A1	3	1514	0.8163	0.83	-0.1429	0.4884	0.944
KRT34	1	1515	0.8163	1.05	0.3869	1.1809	1.1874
ASB12	3	1516	0.8163	0.64	-0.5285	-0.05	0.7156
NTAN1	1	1517	0.8163	1.08	0.1829	1.0157	1.2453
FITM2	2	1518	0.8163	1.44	0.6987	1.8215	1.6791
GRAMD1B	3	1519	0.8163	0.89	0.6382	1.2853	0.9677
RING1	2	1520	0.8163	1.58	1.0183	2.2505	1.8426
SLX4IP	2	1521	0.8163	0.75	-0.6421	-0.0625	0.8666
NUDT8	1	1522	0.8163	2.26	1.387	3.1883	2.6936
CES3	2	1523	0.8163	2.56	0.5326	2.6232	3.1263
SF3B5	1	1524	0.8163	1.25	-0.5864	0.4181	1.5021
FAM173A	3	1525	0.8163	0.14	0.2281	0.2501	0.0329
SORBS1	2	1526	0.8163	0.83	-1.1283	-0.463	0.9949
TCL1B	1	1527	0.8163	1.6	0.0475	1.3264	1.9125
MYBPC2	2	1528	0.8163	0.81	-0.9998	-0.3585	0.959
TMEM199	1	1529	0.8163	3.52	-1.8651	1.1397	4.4934
FAM25C	2	1530	0.8163	1.4	-2.4567	-1.2539	1.7988
SIKE1	2	1531	0.8163	0.33	-0.0619	0.1305	0.2877
PPM1E	1	1532	0.8163	1.74	-1.5356	-0.0689	2.1934
PSMA5	1	1533	0.8163	0.65	-1.7589	-1.2198	0.8062
SLC12A7	3	1534	0.8163	0.66	-0.2607	0.2304	0.7343
VSTM2B	2	1535	0.8163	0.42	-0.0706	0.2001	0.4049
IL22	2	1536	0.8163	0.99	0.6118	1.3493	1.1028
HIST1H2AH	2	1538	0.8163	0.34	0.058	0.2625	0.3058
REEP6	2	1539	0.8163	1.83	0.2919	1.7635	2.2007
TRAM2	3	1540	0.8163	0.81	-0.5501	0.0777	0.9389
PSAT1	3	1541	0.8163	0.37	0.6219	0.823	0.3008
TRMT44	3	1542	0.8163	0.68	0.0315	0.5209	0.7318
RANBP3	2	1543	0.8163	0.45	-0.5956	-0.272	0.4839
Control	116	1544	0.8163	0.1	8.9425	8.5923	-0.5236
GOLGA6L1	1	1545	0.8163	2.42	-4.1219	-1.9805	3.2022
USP17L26	2	1546	0.8163	1.03	-1.9914	-1.1203	1.3026
APP	3	1547	0.8163	0.65	-0.3979	0.0835	0.72
CCT2	1	1548	0.8163	1.25	-1.848	-0.7957	1.5737
CDK1	1	1549	0.8163	2.7	-4.8101	-2.396	3.6101
WFDC2	2	1550	0.8163	0.9	-1.4165	-0.6833	1.0965
SLC27A6	2	1551	0.8163	-0.07	0.0708	-0.0819	-0.2284
VWA8	1	1552	0.8163	1.9	1.0775	2.5807	2.2479
ZNF768	3	1553	0.8163	0.75	-0.4182	0.1568	0.8598
ZNF121	3	1554	0.8163	-0.01	0.15	0.042	-0.1615
ENC1	2	1555	0.8163	1.25	0.8021	1.7558	1.426
IFI6	3	1556	0.8163	0.65	0.3275	0.7854	0.6847
EIF5AL1	2	1557	0.8163	0.68	0.0819	0.5756	0.7382
FGFBP1	1	1558	0.8163	1.93	0.6979	2.2387	2.304
MRPL52	1	1559	0.8163	0.71	-0.6347	-0.0914	0.8125
BMP8A	2	1560	0.8163	0.46	-0.167	0.1451	0.4668
MST1R	1	1561	0.8163	1.85	-0.7007	0.8275	2.2853
OR6P1	1	1562	0.8163	0.39	-1.3842	-1.0879	0.4431
ARFIP2	3	1563	0.8163	0.61	-0.3462	0.1051	0.6749
SMARCB1	1	1564	0.8163	1.98	-1.6605	0.0127	2.5022
PGM2	1	1565	0.8163	0.01	0.0569	-0.0238	-0.1206
RARRES2	2	1566	0.8163	1.18	1.813	2.6635	1.2718
DBR1	1	1567	0.8163	1.91	-3.015	-1.3444	2.4981
PAPOLA	2	1568	0.8163	0.54	-0.6866	-0.2866	0.5981
CER1	2	1569	0.8163	1.29	-2.2143	-1.1064	1.6567
SLC18A1	2	1570	0.8163	1.32	0.9029	1.9092	1.5049
LCN6	3	1571	0.8163	0.91	0.1575	0.8396	1.0199
TMEM242	3	1572	0.8163	0.06	1.1815	1.0965	-0.1271
MORN1	2	1573	0.8163	1.24	-1.836	-0.7915	1.562
LYZL6	3	1574	0.8163	0.55	0.4545	0.8173	0.5425
FOXD4L5	2	1575	0.8163	1.14	0.3835	1.2596	1.31
ZNF12	2	1576	0.8163	0.4	0.9557	1.1738	0.3261
SF3B1	2	1577	0.8163	1.82	-2.7858	-1.2037	2.3659
JAG2	1	1578	0.8163	0.44	0.3067	0.5861	0.4179
PLCB1	2	1579	0.8163	0.74	0.246	0.7798	0.7983
SPRR4	1	1580	0.8163	0.16	0.3715	0.4092	0.0562
PCDHGA10	1	1581	0.8169	2.66	0.3865	2.5683	3.2626
C1QTNF1	1	1582	0.8171	1.46	0.6905	1.825	1.6965
SLC7A9	3	1583	0.8171	0.73	-0.8479	-0.2799	0.8494
MTRNR2L1	2	1584	0.8171	0.77	-0.8858	-0.2766	0.9109
MALSU1	3	1585	0.8171	0.81	-0.6372	-0.0053	0.9449
ACPT	2	1586	0.8171	0.37	-0.1062	0.1297	0.3528
GATA3	3	1587	0.8172	0.38	2.1588	2.3093	0.225
CLEC16A	3	1588	0.8173	1.8	1.4805	2.8797	2.0924
NEIL2	2	1589	0.8176	2.04	-0.3666	1.3095	2.5065
TMX1	1	1590	0.8176	1.31	0.8185	1.8218	1.5003
THEG	2	1591	0.8176	1.63	0.2905	1.5885	1.941
AGPAT1	1	1592	0.8176	1.53	0.2735	1.4913	1.8211
REEP3	2	1593	0.8176	1.16	-2.278	-1.28	1.4923
TMEM120A	1	1594	0.8176	1.64	-0.1388	1.1869	1.9823
TAF9	2	1595	0.8176	0.89	-1.0413	-0.3283	1.0662
METTL17	2	1596	0.8176	0.73	-1.0907	-0.5081	0.8713
GRTP1	1	1597	0.8176	1.37	0.9283	1.9841	1.5789
SFXN1	3	1598	0.8176	0.4	-0.0922	0.1619	0.38
CCS	2	1599	0.8176	0.4	0.8491	1.0708	0.3315
MRPL39	1	1600	0.8176	1.82	-2.7161	-1.137	2.3614
RAB3B	2	1601	0.8176	1.64	0.0086	1.3272	1.9718
FGFR1OP2	2	1602	0.8176	0.16	-0.0026	0.0432	0.0685
ADCY10	3	1603	0.8176	0.16	0.6656	0.6841	0.0276
PLCB3	1	1604	0.818	1.48	-0.2343	0.9537	1.7764
UBXN2A	3	1605	0.8184	0.92	-0.3175	0.3977	1.0696
PSMD2	2	1606	0.8185	1.31	-2.5765	-1.4391	1.7009
MKLN1	2	1607	0.8185	0.49	-0.0862	0.2474	0.4988
PPA2	1	1608	0.8185	1.58	-0.8553	0.4462	1.9462
TRAF3IP2	2	1609	0.8185	0.9	-0.4752	0.2259	1.0485
MLYCD	3	1610	0.8195	0.86	-1.2035	-0.5095	1.0377
STX11	2	1611	0.8198	0.5	2.1012	2.3633	0.3918
CASK	3	1612	0.8201	0.63	0.7571	1.1807	0.6334
SEC24C	2	1613	0.8204	-0.18	-0.0941	-0.3327	-0.3569
ZNF384	2	1614	0.8204	0.66	-0.0824	0.3991	0.72
SLC5A2	1	1615	0.821	1.34	0.8527	1.8812	1.538
DHX9	1	1616	0.821	2.62	-4.6954	-2.3546	3.5003
GADD45GIP1	2	1617	0.821	1.79	-2.0103	-0.4882	2.2762
DPH5	3	1618	0.821	0.34	-0.1226	0.0877	0.3146
MRPL51	2	1619	0.821	1.25	-1.6208	-0.5729	1.567
N6AMT1	2	1620	0.821	0.87	-0.9391	-0.2422	1.0422
SP2	2	1621	0.821	0.1	0.2348	0.2203	-0.0217
FAM26F	3	1622	0.821	0.62	0.1487	0.5839	0.6508
ISLR2	3	1623	0.821	0.34	0.8228	0.9943	0.2565
GDNF-AS1	2	1624	0.821	1.07	-1.2155	-0.3415	1.3069
NDUFA4L2	2	1625	0.821	1.1	-1.1265	-0.2325	1.3368
GTF3C6	1	1626	0.821	0.53	-0.8684	-0.4677	0.5991
FOXF1	3	1627	0.821	1.24	-0.4173	0.573	1.4808
PWP1	1	1628	0.821	1.39	-2.3688	-1.1752	1.7849
GCSH	1	1629	0.821	1.8	-3.0106	-1.4369	2.3533
NEK1	2	1630	0.821	0.41	0.5192	0.764	0.3662
RCOR2	1	1631	0.8216	1.7	0.0178	1.3844	2.0436
ERLIN2	1	1632	0.8224	0.63	-0.3791	0.0838	0.6922
UBL7	2	1633	0.823	1.61	0.5554	1.825	1.8985
C10orf105	1	1634	0.8239	1	1.3922	2.1095	1.0727
GRM1	1	1635	0.8239	0.88	1.2633	1.8784	0.9198
B3GNTL1	3	1636	0.8239	0.91	1.2549	1.8953	0.9578
SNRK	2	1637	0.8242	-0.22	0.1743	-0.1085	-0.423
BEND6	1	1638	0.825	1.45	0.6033	1.7366	1.6947
GPR153	3	1639	0.8256	0.72	0.7562	1.2601	0.7535
UBE3C	3	1640	0.8257	0.41	0.4373	0.6813	0.3649
SLC2A8	3	1641	0.8257	1.05	-1.3342	-0.474	1.2863
EPCAM	1	1642	0.8269	1.12	1.3318	2.1568	1.2337
PCNXL2	3	1643	0.8269	0.61	0.0947	0.5287	0.6491
STC1	2	1644	0.8271	2.51	0.4513	2.5042	3.0698
DROSHA	2	1645	0.8274	1.07	-2.1083	-1.1945	1.3665
MCM3AP	2	1646	0.8278	0.53	-0.5467	-0.1601	0.5781
HLA-DQB1	2	1647	0.8278	0.19	0.5411	0.598	0.085
SLC22A31	3	1648	0.8278	0.39	0.6062	0.8275	0.3309
JAK1	1	1649	0.8278	0.46	1.5713	1.8198	0.3716
MRPL18	3	1650	0.8278	0.5	0.4662	0.7848	0.4764
LMBRD1	2	1651	0.8278	0.78	0.2039	0.7725	0.8503
RRP1B	2	1652	0.8281	0.58	0.3152	0.7111	0.5921
GCNT2	2	1653	0.8293	0.67	-1.0365	-0.51	0.7872
C16orf95	1	1654	0.8293	1.05	1.6869	2.4377	1.1227
CHCHD1	2	1655	0.8293	1.16	0.5589	1.4443	1.3241
CCDC160	2	1656	0.8293	0.29	0.4012	0.5494	0.2217
PARP2	1	1657	0.8295	0.87	0.7298	1.3567	0.9375
TRPV1	3	1658	0.8305	0.63	-0.4793	-0.0136	0.6964
ALYREF	1	1659	0.8316	1.74	-3.3167	-1.781	2.2965
CADPS2	2	1660	0.8318	1.06	-0.0403	0.7824	1.2303
RNASE6	1	1661	0.8321	1.53	0.0196	1.2465	1.8346
PPAN	2	1662	0.8321	1.14	-1.976	-1.0094	1.4454
INF2	2	1663	0.8321	0.71	0.4491	0.9534	0.7541
PCM1	3	1664	0.8326	0.7	-0.289	0.2329	0.7805
SCG3	3	1665	0.8326	0.4	0.6343	0.8671	0.3481
KRTAP19-3	2	1666	0.8336	0.96	0.8242	1.5274	1.0516
FZD7	2	1667	0.8357	2.15	-0.9088	0.8874	2.686
FBXO8	2	1668	0.8357	0.75	-0.3359	0.232	0.8493
PTMA	3	1669	0.8371	0.87	-0.906	-0.2096	1.0413
BNIPL	2	1670	0.8371	0.59	-0.6221	-0.1796	0.6617
CENPM	1	1671	0.8371	1.56	-2.0645	-0.733	1.991
STX1B	3	1672	0.8371	0.61	0.8631	1.2657	0.6021
PYGO2	3	1673	0.839	0.54	-0.1555	0.2245	0.5683
TANGO6	1	1674	0.8392	1.27	-2.7077	-1.5985	1.6587
OR2AT4	2	1675	0.8393	1.56	-0.7159	0.566	1.9169
MESDC2	2	1676	0.8393	0.6	0.2942	0.7096	0.6211
NIPAL1	1	1677	0.8393	1.1	0.849	1.6749	1.2351
RELL1	1	1678	0.8393	1.35	0.9715	2.0016	1.5404
SLC9A4	1	1679	0.8393	0.98	0.5185	1.2522	1.0971
ZNF747	2	1680	0.8393	1.39	0.9133	1.9789	1.5935
PRR11	3	1681	0.8393	0.7	0.388	0.8862	0.7451
PDCD6IP	1	1682	0.8397	0.69	-0.0026	0.5011	0.7532
PRAMEF9	2	1683	0.8397	0.53	-0.2405	0.1357	0.5625
LTB4R2	2	1684	0.8413	0.55	1.8864	2.1939	0.4598
INTS4	1	1685	0.8413	1.24	-1.7811	-0.7412	1.5552
ARPC2	3	1686	0.8413	0.55	0.5248	0.8888	0.5443
FNBP4	2	1687	0.8419	0.91	-0.3505	0.3549	1.0548
CHST1	3	1688	0.842	0.55	0.1628	0.5427	0.5681
PALMD	2	1689	0.842	0.62	-0.7822	-0.3063	0.7116
EDF1	2	1690	0.842	1.58	-0.5837	0.7102	1.9349
KCNA5	3	1691	0.842	0.59	0.2902	0.6926	0.6017
IPO5	2	1692	0.842	0.24	0.029	0.1444	0.1727
PGGT1B	1	1693	0.842	2.13	-1.1438	0.6373	2.6634
NYNRIN	3	1694	0.842	0.5	1.4476	1.7277	0.4189
ZNF761	1	1695	0.842	1.27	0.4124	1.3986	1.4747
C19orf81	2	1696	0.8431	0.93	1.4317	2.0893	0.9833
ATP6V0A2	2	1697	0.8431	1.25	-0.3791	0.616	1.488
CEP44	2	1698	0.8431	2.35	0.0812	2.0081	2.8814
TRMT5	2	1699	0.8431	0.8	-0.4871	0.1308	0.924
PJA2	1	1700	0.8431	1.39	0.8205	1.8915	1.6016
TPSG1	3	1701	0.8431	1.8	-1.1157	0.384	2.2427
URGCP-MRPS24	2	1702	0.8431	0.08	0.3359	0.3011	-0.0521
KRTDAP	2	1703	0.8441	0.76	0.5977	1.1355	0.8041
CWH43	2	1704	0.8449	1.3	1.2804	2.2571	1.4605
UROC1	1	1705	0.845	1.61	-0.5599	0.7556	1.9671
PRCC	3	1706	0.845	1.29	-1.3184	-0.2476	1.6013
RPS6	2	1707	0.845	0.86	-1.4488	-0.7437	1.0545
ZNF599	2	1708	0.845	0.35	1.2487	1.4141	0.2473
SGK494	1	1709	0.845	1.77	0.8281	2.2262	2.0906
ZFHX3	2	1710	0.8452	1.87	-1.0627	0.492	2.325
HSF4	3	1711	0.8452	0.33	0.5979	0.7663	0.2518
UBE2I	1	1712	0.8452	2.16	-3.5995	-1.7001	2.8403
ANKRD20A3	2	1713	0.8452	0.24	0.5711	0.6668	0.1432
POLR1D	2	1714	0.8452	0.89	-1.8055	-1.0621	1.1117
ASNA1	2	1715	0.8452	0.63	-0.2347	0.2303	0.6954
HDDC3	3	1716	0.8452	0.6	0.2836	0.7004	0.6232
PPAP2C	3	1717	0.8452	0.7	-0.0466	0.4674	0.7686
KIF3B	2	1718	0.8452	1.11	-1.4055	-0.4866	1.3741
PPM1B	1	1719	0.8452	1.06	2.3955	3.1233	1.0884
TOR1AIP2	2	1720	0.8458	0.62	-0.7924	-0.3203	0.706
TEFM	2	1721	0.8458	0.34	-0.0539	0.1501	0.3051
RGS9BP	1	1722	0.8461	0.55	0.3696	0.7415	0.556
HNRNPH3	3	1723	0.8461	0.09	0.8947	0.8497	-0.0672
IAH1	1	1724	0.8461	0.85	0.4409	1.0652	0.9335
TMCO3	2	1725	0.8461	1.1	-2.1788	-1.2412	1.4021
MRPL10	1	1726	0.8461	0.29	-0.573	-0.3954	0.2655
NAT6	2	1727	0.8461	0.46	-0.1143	0.1975	0.4662
LRRN4	2	1728	0.8461	2.08	0.7871	2.4559	2.4955
FNIP1	3	1729	0.8461	0.65	-0.6143	-0.1251	0.7315
ZFP14	3	1730	0.8461	0.94	1.0404	1.7219	1.0191
ADGRF3	3	1731	0.8461	0.37	0.6132	0.8214	0.3113
CARS	2	1732	0.8461	0.75	-0.9392	-0.3442	0.8898
ABHD6	2	1733	0.8461	0.82	-0.8851	-0.2381	0.9675
ZNF619	2	1734	0.8461	1.88	-2.1566	-0.5498	2.4028
NDC1	3	1735	0.8461	1.08	-0.6093	0.2493	1.284
RPRD2	3	1736	0.8461	0.38	1.7471	1.9203	0.2589
BAG5	3	1737	0.8461	0.61	0.126	0.5526	0.6378
C1QL3	2	1738	0.8461	1.21	1.6793	2.5656	1.3253
DPP7	3	1739	0.8461	0.63	0.9365	1.3531	0.6229
FDX1L	2	1740	0.8461	1.13	-1.7573	-0.8131	1.412
OR11A1	2	1741	0.8461	0.77	-0.7471	-0.1468	0.8978
PKIA	2	1742	0.8461	0.04	-0.0743	-0.1305	-0.0842
ZBTB16	3	1743	0.8461	0.36	0.903	1.0916	0.282
PRODH	2	1744	0.8461	0.35	0.3832	0.5764	0.2889
IQCA1L	3	1745	0.8461	0.54	-0.1191	0.2563	0.5614
HYDIN	3	1746	0.8461	0.33	-0.2909	-0.0847	0.3083
CSGALNACT1	1	1747	0.8461	1.28	1.0412	2.0097	1.4483
OR8G5	2	1748	0.8461	0.77	-1.1403	-0.523	0.923
SCGB1C2	3	1749	0.8461	0.54	-0.1017	0.2726	0.5597
RXRB	3	1750	0.8461	0.34	0.3389	0.5309	0.2871
LGI3	1	1751	0.8461	1.19	0.7546	1.6546	1.3458
MAD2L1	2	1752	0.8461	1.08	-1.9818	-1.0697	1.364
WNT10B	2	1753	0.8461	1.29	-1.4609	-0.3887	1.6033
RAD52	3	1754	0.8461	0.28	0.0926	0.2434	0.2255
EGFL7	1	1755	0.8461	0.89	1.4196	2.0427	0.9318
CCDC120	3	1756	0.8461	0.3	0.3971	0.5511	0.2304
CLPB	2	1757	0.8461	1.52	-1.2781	-0.0172	1.8856
MZT2A	3	1758	0.8461	0.8	1.1419	1.6939	0.8254
STX19	3	1759	0.8461	0.06	0.0926	0.0504	-0.0631
SCEL	2	1760	0.8461	1.05	0.4454	1.2377	1.1847
DUSP18	1	1761	0.8465	0.82	1.1375	1.7119	0.8589
SLC12A3	2	1762	0.8473	1.65	-0.1812	1.1513	1.9925
SIX1	2	1763	0.8473	0.76	0.9269	1.4579	0.7941
NWD1	2	1764	0.8473	0.39	-0.1744	0.0805	0.3811
ADM2	3	1765	0.8473	1.06	0.1029	0.9178	1.2186
COPS5	1	1766	0.8473	-0.4	-0.0788	-0.5057	-0.6383
USF2	2	1767	0.8473	0.88	-0.9893	-0.2869	1.0503
CCL21	2	1768	0.8473	0.53	0.4762	0.8212	0.5159
PPP1R26	3	1769	0.8473	0.28	0.1832	0.3312	0.2213
TRANK1	3	1770	0.8473	0.36	0.2479	0.4572	0.3129
TXNDC11	2	1771	0.8473	1.94	0.9857	2.5219	2.2972
CTDNEP1	3	1772	0.8473	0.65	-0.4998	-0.0086	0.7346
EXOC3L1	2	1773	0.8473	0.96	0.4845	1.2016	1.0724
MFSD2A	1	1774	0.8473	0.74	1.1115	1.6188	0.7585
PDE4DIP	1	1775	0.8479	1.94	-3.1755	-1.4761	2.5414
PAICS	2	1776	0.8479	2.46	-3.4059	-1.2552	3.2161
LENG8	2	1777	0.8482	1.05	-0.7272	0.1166	1.2619
TNFSF13B	3	1778	0.8485	0.93	-0.8551	-0.1098	1.1144
TP53RK	1	1779	0.8486	1.49	-2.6389	-1.3423	1.9389
ZSCAN5B	3	1780	0.8486	0.5	-0.4616	-0.107	0.5304
FOXRED2	1	1781	0.8488	0.49	-0.8117	-0.4515	0.5387
SRGAP2	2	1782	0.8488	1.01	1.5021	2.2219	1.0764
COX16	3	1783	0.8488	0.48	-0.0306	0.2955	0.4876
ETS1	3	1784	0.849	1.32	-1.8901	-0.7754	1.6669
CT47A7	1	1785	0.849	1.9	0.2542	1.7829	2.2858
HIST1H2BA	2	1786	0.8504	0.54	-1.0332	-0.6208	0.6167
PEX2	1	1787	0.8504	1.25	0.9161	1.8649	1.4188
BTF3	2	1788	0.8504	0.18	0.689	0.7308	0.0624
INSRR	3	1789	0.8504	0.76	0.083	0.6397	0.8326
C1orf194	1	1790	0.8504	0.88	0.4689	1.1212	0.9755
RPP25L	3	1791	0.8504	0.31	0.5239	0.6805	0.2341
HEATR5B	3	1792	0.8504	0.4	0.3014	0.541	0.3584
PPP1CC	2	1793	0.8504	0.3	-0.5301	-0.3396	0.2848
MFN2	3	1794	0.8504	0.9	-0.9207	-0.2025	1.074
PTPDC1	2	1795	0.8504	1.43	-1.1967	-0.0077	1.778
PPP1R16B	3	1796	0.8504	0.53	-0.1455	0.228	0.5586
KCNMB2	2	1797	0.8504	1.13	0.6463	1.5011	1.2783
OS9	1	1798	0.8504	0.58	-1.0886	-0.6411	0.6692
ZMYND12	2	1799	0.8504	1	0.607	1.3571	1.1217
CASKIN1	3	1800	0.8504	0.39	1.1904	1.3885	0.2963
PTHLH	2	1801	0.8504	0.87	-1.4173	-0.7065	1.0629
LSR	3	1802	0.8504	0.32	0.6699	0.8296	0.2387
ZNF654	2	1803	0.8504	1.49	-0.1229	1.0689	1.7821
CSTF1	2	1804	0.8504	0.54	-0.08	0.2964	0.5628
GLOD4	2	1805	0.8504	0.23	-0.4436	-0.3219	0.1819
EIF3D	2	1806	0.8504	1.48	-2.096	-0.8366	1.8832
FXYD6	2	1807	0.8504	1.36	1.2469	2.2775	1.541
COMMD3	2	1808	0.8504	1.55	-2.232	-0.9077	1.9803
PIAS4	2	1809	0.8504	0.56	0.945	1.3036	0.5362
PPAPDC2	2	1810	0.8504	0.41	0.9083	1.1384	0.3441
TG	3	1811	0.8504	0.9	-1.2851	-0.5492	1.1004
VPS39	2	1812	0.8504	1.39	-1.4608	-0.3025	1.732
SERPINC1	2	1813	0.8504	0.38	-0.7794	-0.5121	0.3997
SRCIN1	1	1814	0.8504	0.67	1.2217	1.6595	0.6547
PPP1R35	2	1815	0.8504	1.09	-1.4588	-0.5517	1.3565
KIF1BP	1	1816	0.8504	2.21	-0.8433	0.9985	2.7541
KIRREL2	1	1817	0.8504	0.19	1.6414	1.6535	0.0181
TCAP	3	1818	0.8504	0.83	1.1236	1.7011	0.8636
EPHX4	3	1819	0.8504	0.7	0.2432	0.7414	0.745
DBNDD1	3	1820	0.8504	0.99	0.4928	1.233	1.1068
SOCS2	3	1821	0.8504	1.04	0.4766	1.262	1.1746
MRPL3	2	1822	0.8504	0.74	-1.1886	-0.5947	0.8882
OSGIN2	2	1823	0.8504	1.08	-1.6889	-0.7833	1.3542
C16orf91	3	1824	0.8504	1.45	-0.3109	0.8595	1.7502
CHRNG	1	1825	0.8504	2.3	0.9384	2.7915	2.7711
OR1B1	2	1826	0.8504	0.43	-0.1529	0.1353	0.431
DENR	2	1827	0.8504	1.43	-2.284	-1.0565	1.8355
DPH6	2	1828	0.8506	0.5	-0.5293	-0.165	0.5447
SLC31A1	2	1829	0.8508	0.68	-0.1046	0.398	0.7515
PKDCC	2	1830	0.8508	1.4	0.6999	1.7862	1.6245
CDC5L	2	1831	0.8513	1.07	-2.238	-1.3235	1.3676
ZFHX4	2	1832	0.8513	0.69	0.2132	0.7116	0.7453
PAX1	2	1833	0.8525	0.6	-0.4343	0.0086	0.6624
KAAG1	3	1834	0.8525	0.45	-0.2886	0.0189	0.4599
ARHGAP1	3	1835	0.8528	-0.38	0.8782	0.4266	-0.6753
MRPL37	2	1836	0.8528	0.53	-0.7288	-0.3338	0.5907
PDPR	1	1837	0.8528	0.64	-0.5832	-0.0979	0.7257
HIST1H2AM	2	1838	0.8528	0.88	-1.6734	-0.946	1.0877
OLFM3	1	1839	0.8528	0.92	0.3694	1.0533	1.0228
SPINT4	2	1840	0.8528	0.26	0.0949	0.2242	0.1933
TTR	1	1841	0.8528	0.72	1.02	1.5064	0.7273
DYNC1I2	2	1842	0.8528	0.56	-0.3562	0.0476	0.6039
DIP2B	3	1843	0.8528	0.28	-0.6325	-0.4584	0.2604
BRPF1	3	1844	0.8528	0.64	0.0213	0.4833	0.6909
AHSA1	3	1845	0.8528	0.53	-0.019	0.3449	0.5442
ABAT	2	1846	0.8528	2.67	-0.369	1.8513	3.3201
FICD	3	1847	0.8528	0.51	0.0798	0.4237	0.5143
GMPS	1	1848	0.8528	2.28	-4.3125	-2.2794	3.0403
CPLX2	3	1849	0.8528	0.55	0.1332	0.5136	0.5688
HDAC6	2	1850	0.8528	2.03	-0.1524	1.5043	2.4774
ATP7B	3	1851	0.8528	0.96	-0.87	-0.0975	1.1552
HSD17B8	2	1852	0.853	1.05	1.3695	2.1333	1.1422
ARHGEF17	1	1853	0.853	0.62	-1.3935	-0.9004	0.7374
GPATCH2	2	1854	0.853	0.21	0.011	0.0978	0.1299
NFRKB	2	1855	0.8534	0.66	-0.0664	0.4149	0.7198
NGEF	3	1856	0.8534	0.57	0.5846	0.9587	0.5595
CSMD3	2	1857	0.8538	0.79	0.9636	1.5146	0.8239
DNAJC2	3	1858	0.8538	0.75	-0.4232	0.1503	0.8575
USE1	3	1859	0.8538	1.23	-1.0198	-0.0131	1.5055
GALR1	2	1860	0.8538	0.04	-0.3364	-0.3804	-0.0658
SUCLG1	1	1861	0.8538	1.67	-2.8605	-1.4037	2.1786
IPO13	2	1862	0.8538	1.25	-0.5541	0.4506	1.5024
MCMBP	1	1863	0.8538	1.43	-1.8597	-0.6519	1.8061
ATP1B3	2	1864	0.8538	0.84	-0.5649	0.0876	0.9757
MSH6	2	1865	0.8538	1.14	-1.3452	-0.4008	1.4123
BRF1	1	1866	0.8538	0.79	-0.0891	0.5048	0.888
LOX	3	1867	0.8538	0.58	0.3485	0.746	0.5944
FOXB1	2	1868	0.8541	1.7	0.4961	1.8471	2.0202
MS4A10	1	1869	0.8546	2.39	-0.0748	1.8939	2.9439
SP140	3	1870	0.8546	0.98	-1.2016	-0.4018	1.196
DDX31	2	1871	0.8546	0.57	-0.0541	0.3464	0.5988
CFHR4	3	1872	0.8546	0.67	0.4333	0.9047	0.7049
RAB11FIP1	2	1873	0.8546	0.66	1.1192	1.5517	0.6468
IFNA2	2	1874	0.8546	0.18	1.1752	1.1962	0.0315
ZDHHC5	2	1875	0.8546	0.29	0.1262	0.2825	0.2337
HRCT1	3	1876	0.8546	0.61	-0.567	-0.113	0.6789
TOR3A	3	1877	0.8546	0.45	0.1087	0.4034	0.4407
MOCS3	1	1878	0.8546	2.21	-4.1817	-2.2098	2.9488
FOXA1	3	1879	0.8546	0.59	0.6168	1.0136	0.5934
TELO2	2	1880	0.8546	1.09	-1.2883	-0.3953	1.3354
ZNF521	2	1881	0.8546	1.13	-0.1198	0.7641	1.3218
TNFAIP3	2	1882	0.8546	0.34	0.8215	0.9889	0.2503
COX20	3	1883	0.8546	1.12	-1.2234	-0.3074	1.3699
TUBA1B	2	1884	0.8546	0.95	-1.3265	-0.5538	1.1555
ATOH8	3	1885	0.8546	0.55	0.2316	0.6031	0.5555
RIMBP3C	1	1886	0.8546	0.9	-0.2204	0.4744	1.039
CCNA1	3	1887	0.8546	0.5	-0.2644	0.0822	0.5184
IL9R	3	1888	0.8546	0.79	0.0317	0.6177	0.8763
TPPP3	2	1889	0.8546	0.55	0.3797	0.7456	0.5472
SPCS3	2	1890	0.8546	0.78	0.7731	1.3251	0.8254
XPNPEP2	2	1891	0.8573	0.3	0.5919	0.7335	0.2117
TRIM59	1	1892	0.8573	1.19	-0.1224	0.8137	1.3999
ITPA	1	1893	0.8573	2.56	-4.9663	-2.6701	3.4338
CHCHD5	3	1894	0.8573	0.99	0.3292	1.0731	1.1125
TFAP2E	2	1895	0.8573	1.36	0.3842	1.4472	1.5897
CCDC88A	2	1896	0.8573	1.04	-2.1884	-1.2974	1.3324
FOXD1	2	1897	0.8574	1.63	-2.5948	-1.1854	2.1076
SNRNP40	2	1898	0.8574	1.4	-1.8544	-0.6694	1.772
OR7G3	3	1899	0.8574	0.67	1.0413	1.484	0.6621
SYNJ2BP-COX16	1	1900	0.8574	0.83	1.4387	2.0095	0.8536
DGAT1	3	1901	0.8574	0.7	-0.2094	0.313	0.7811
COX18	2	1902	0.8574	1.02	-1.6251	-0.7755	1.2706
SGSM2	3	1903	0.8574	0.37	0.2761	0.4972	0.3307
HMOX1	2	1904	0.8574	0.58	1.3889	1.741	0.5266
TTC31	2	1905	0.8595	1.39	-0.2694	0.8473	1.67
FDXR	1	1906	0.8599	0.82	-0.847	-0.2019	0.9647
CGB7	3	1907	0.8599	1.14	-1.1012	-0.1733	1.3875
MS4A14	3	1908	0.8599	0.8	1.0028	1.5614	0.8353
SEC14L1	1	1909	0.8599	1.18	0.6793	1.5804	1.3476
SPDYE6	1	1910	0.8599	1.66	-2.7242	-1.2803	2.1592
PRC1	2	1911	0.8599	1.05	-1.6557	-0.7779	1.3126
USP33	3	1912	0.8599	0.81	-0.3893	0.2319	0.929
ADAMTS20	1	1913	0.86	0.84	0.0377	0.6648	0.9377
TLR5	2	1914	0.861	1.07	-1.9727	-1.0697	1.3504
C1orf137	1	1915	0.861	1.28	-2.268	-1.1728	1.6377
TBL1X	3	1916	0.861	0.6	0.5677	0.9706	0.6025
SIRT7	2	1917	0.861	0.51	-0.438	-0.0695	0.5511
SAMD4B	2	1918	0.861	0.83	-0.1396	0.4931	0.9462
MRPS18B	2	1919	0.861	0.55	0.1354	0.513	0.5647
HSD17B6	2	1920	0.8614	0.2	0.3596	0.4276	0.1016
ZNF79	2	1921	0.8614	0.68	-0.9372	-0.4031	0.7987
LOC100652758	1	1922	0.8615	0.88	-1.4781	-0.755	1.0814
NARS2	3	1923	0.8619	0.53	-0.5746	-0.1899	0.5753
DYNC1LI1	1	1924	0.8619	1.37	1.0168	2.0641	1.5661
ZNF398	3	1925	0.8619	0.36	0.3524	0.5623	0.3138
APRT	2	1926	0.8656	0.53	0.2327	0.5894	0.5334
OR4F15	1	1927	0.8661	0.77	-0.1179	0.4586	0.8621
OLFM4	1	1928	0.8662	0.59	1.8482	2.1915	0.5135
HIST1H2AJ	3	1929	0.8662	1.05	-1.222	-0.3593	1.2902
RNF224	1	1930	0.8662	0.3	-0.6666	-0.4712	0.2923
ZIM3	2	1931	0.8664	0.53	-0.4343	-0.0484	0.5771
CSF3R	2	1932	0.8664	0.39	-0.0378	0.2057	0.3642
CCDC169-SOHLH2	2	1933	0.8664	0.7	-0.1871	0.3324	0.7769
PGM5	1	1934	0.8664	0.98	0.409	1.1445	1.1
SPEF2	3	1935	0.8664	0.25	0.38	0.49	0.1645
UPP1	3	1936	0.8664	0.89	-0.2738	0.4135	1.0278
NGDN	2	1937	0.8664	0.95	-1.3859	-0.6035	1.1701
FAM35A	3	1938	0.8664	1.11	0.7507	1.5887	1.2531
CBLL1	2	1939	0.8664	0.76	0.1521	0.709	0.8328
ICT1	2	1940	0.8667	1.44	-1.0433	0.1399	1.7694
LIN37	2	1941	0.8667	0.97	0.6919	1.4084	1.0713
METTL21B	2	1942	0.8667	0.71	-0.1017	0.4241	0.7863
SMAD3	3	1943	0.8667	1.27	0.2512	1.2409	1.48
LRRC37A	1	1944	0.8684	0.62	-1.3349	-0.8409	0.7388
APOE	3	1945	0.8684	0.77	-0.2048	0.3734	0.8646
CYP4F2	2	1946	0.8684	0.54	-0.23	0.1509	0.5697
PARK7	3	1947	0.8688	0.62	0.2996	0.7301	0.6437
IGFBP5	3	1948	0.8692	0.77	0.5704	1.1178	0.8186
ST3GAL5	1	1949	0.8694	0.17	-0.7787	-0.6937	0.1272
AMN1	1	1950	0.8694	1.44	1.3189	2.4182	1.6439
ZNF433	2	1951	0.8694	0.67	-1.3579	-0.8185	0.8065
SPATA31C1	1	1952	0.8694	1.23	0.4572	1.4041	1.416
GFER	2	1953	0.8696	1.15	-2.8858	-1.8812	1.5023
ITGAM	2	1954	0.8704	0.82	-0.6013	0.0401	0.9591
UQCC2	3	1955	0.8708	0.68	-0.188	0.318	0.7566
DOCK10	2	1956	0.8719	0.89	-1.0361	-0.3256	1.0624
KIAA0020	2	1957	0.8719	1.17	-2.4302	-1.4186	1.5127
TMEM194A	2	1958	0.8727	0.83	-1.1968	-0.525	1.0046
GTPBP4	1	1959	0.8737	2.08	-3.9506	-2.0954	2.7743
DVL1	1	1960	0.8737	0.6	0.2085	0.6245	0.622
DPH3P1	2	1961	0.8737	0.76	0.0556	0.6161	0.8381
BABAM1	2	1962	0.8737	0.85	-1.8624	-1.1489	1.0669
KCNG4	1	1963	0.8737	0.36	1.8577	2.0095	0.227
BOLA2	2	1964	0.8737	0.58	-0.9126	-0.4676	0.6654
SYS1	1	1965	0.8739	1.58	-3.4168	-2.0179	2.0919
THRA	3	1966	0.8739	0.38	0.3674	0.593	0.3374
DGKI	2	1967	0.8739	0.55	-0.0977	0.2921	0.5829
TEN1	2	1968	0.8739	0.35	0.9432	1.1145	0.2562
DCLRE1B	2	1969	0.8739	1.22	-2.4573	-1.4065	1.5714
WDR55	2	1970	0.8739	1.4	-1.6971	-0.5184	1.7626
ALDH18A1	2	1971	0.8739	1.38	-2.2769	-1.0928	1.7706
SCCPDH	2	1972	0.8746	1.04	-1.5329	-0.6672	1.2945
POP5	2	1973	0.8746	0.92	-1.736	-0.9718	1.1428
PPIF	3	1974	0.8746	0.31	-0.117	0.0681	0.2767
USP51	3	1975	0.8746	0.75	-0.484	0.0856	0.8518
SH2D5	1	1976	0.8746	0.76	0.5838	1.1219	0.8047
CHD4	2	1977	0.8746	1.32	-2.0785	-0.9552	1.6799
TEX22	2	1978	0.8746	-0.06	1.0833	0.9012	-0.2723
TAS2R60	2	1979	0.8746	1.44	-2.8722	-1.6194	1.8735
C17orf89	3	1980	0.8746	0.65	0.3946	0.8516	0.6834
WDR83OS	2	1981	0.8746	0.69	1.47	1.9187	0.671
XRCC1	2	1982	0.8746	0.52	1.0451	1.3608	0.4721
ISCA1	1	1983	0.8746	0.74	-0.8189	-0.2375	0.8694
KLK11	3	1984	0.8749	0.84	-1.2517	-0.5722	1.0162
ACTL10	3	1985	0.8758	0.35	0.2599	0.4633	0.3041
PET117	1	1986	0.8758	0.61	0.6933	1.1022	0.6115
FASLG	2	1987	0.8758	1.3	-2.4188	-1.2962	1.6788
PHLDA3	1	1988	0.8758	1.17	0.8534	1.7364	1.3205
GPI	3	1989	0.8758	1.07	-1.144	-0.2701	1.3067
MTRNR2L5	2	1990	0.8758	0.27	-0.6155	-0.4502	0.2473
CD53	1	1991	0.8758	0.82	0.9245	1.503	0.8652
R3HDML	3	1992	0.8758	0.48	-0.7968	-0.4423	0.5302
MATN3	2	1993	0.8763	0.57	0.2155	0.6042	0.5812
TNFAIP8L2	3	1994	0.8763	0.53	-0.3137	0.0651	0.5664
NUFIP1	3	1995	0.8763	1.33	-0.8303	0.2536	1.6208
OR14I1	2	1996	0.8763	0.22	0.7455	0.8199	0.1112
STT3A	2	1997	0.8765	0.62	-0.2585	0.192	0.6736
DNLZ	2	1998	0.8765	0.85	-1.6829	-0.9743	1.0596
MISP	2	1999	0.8765	-0.12	0.6302	0.4106	-0.3284
TMEM125	2	2000	0.8765	0.58	0.7539	1.1294	0.5617
GPR12	1	2001	0.8765	0.98	0.0081	0.7597	1.1239
NAE1	2	2002	0.8765	1	-1.1416	-0.3262	1.2194
[truncated: 16,961 more rows]

## Sheet: Enriched gene p<0.05 read count
	Enriched sgRNA	Enriched Rank	Enriched P-Value	sgRNA	Brunello Library	D0	C1D7	C2D7	P1D7	P2D7	C1D14	C2D14	P1D14	P2D14
CCDC101	4	1	0.0004	CCDC101_ACAATGACTCGGAGCCACCC	1970	1464	1137	929	4348	4489	563	653	297060	127014
				CCDC101_ACATCCAGAAGACCCATGAG	1753	1901	1431	1155	3554	5255	811	714	319944	124058
				CCDC101_CCAGGCTTCCCGATCCACAG	876	612	259	217	1252	1654	161	151	50048	64843
				CCDC101_TATTACCGGACAAAGCTGCG	1261	799	910	449	2818	3557	435	379	74933	75045
TAF6L	4	2	0.0004	TAF6L_AGATCCTGGCAGATCCTGTG	2572	2237	1935	2041	10564	10555	990	1365	344031	331469
				TAF6L_CACCCCTTACCCGATCCTTG	975	548	580	519	1012	1439	390	313	29940	50210
				TAF6L_GCAGACGAACTCCAAGATTG	1263	876	1046	1054	2956	4297	601	634	119749	133691
				TAF6L_TCATGAAGCACACCAAACGC	1157	423	465	338	1746	1904	286	357	75456	54628
SUPT20H	4	3	0.0004	SUPT20H_GATCAAAGACCGATGCTGAG	428	277	265	172	763	653	154	123	12557	20474
				SUPT20H_GGATATTCTCTGATGCTCAG	898	511	477	387	2911	1460	276	288	46337	43815
				SUPT20H_TACCGAAGACTGAACTGACA	1377	1217	891	1265	2286	2243	981	1004	58124	17740
				SUPT20H_TGATAACCACAAATGGACCC	3356	3201	2983	2441	8345	8926	1760	1765	579524	547122
TADA2B	4	4	0.0004	TADA2B_ACAGACCACACCTGTCCCAG	388	296	105	218	319	704	234	182	14717	10046
				TADA2B_ATCTCGTAATCATCCCGCAG	2764	2239	1872	1707	3280	3768	1365	1324	313269	469041
				TADA2B_CATGACATGAACTGGTACAG	1194	995	1134	916	3824	3505	608	751	228672	237183
				TADA2B_TCCGCACGTACATGTCCACG	666	448	578	276	519	1032	360	341	71760	27700
NF2	4	5	0.0004	NF2_CGAGATGGAGTTCAATTGCG	1307	1931	4603	3759	10654	9659	5564	5498	174309	133478
				NF2_GACCCCAGTGTTCACAAGCG	763	1236	2523	2236	2293	2577	3851	3078	46855	36069
				NF2_GCTTGGTACGCAGAGCACCG	479	776	1587	1709	3888	2720	2444	2056	40905	24142
				NF2_GGAGGAGGCTGAACGCACGA	516	590	1314	1136	3827	3496	1374	1023	31978	97298
MED12	3	6	0.0004	MED12_ACATCGACTGCTGGACAATG	1279	1054	779	527	5034	5821	377	484	90771	103845
				MED12_CAGTGAGTAGTGCCAAACCA	3422	2670	2685	2415	13329	16880	1515	1578	545333	527548
				MED12_GTGGCGTACTGCACGTGTCG	15	0	0	7	0	0	0	0	0	0
				MED12_TTCACATTATGACCAACACC	1919	1411	1528	1180	11933	7808	839	941	289647	265688
TADA3	4	7	0.0004	TADA3_ATGACCCTATCGACGTGCCA	931	557	598	422	589	561	131	180	4015	1679
				TADA3_GGATGATGGCATCGGCATCG	8572	7310	6504	6289	7132	13372	4969	4920	706291	3127060
				TADA3_TCAGTAACTCCTCAAGTGTG	849	873	543	415	1357	1791	391	279	55292	72547
				TADA3_TCTTATCCTGCCAGTCGGTG	1156	1274	1012	926	1398	1638	987	681	8300	17570
CUL3	4	8	0.0004	CUL3_ATAACTTGTACATGCAACCA	2902	3133	3367	2788	17512	13368	2257	2221	229457	564693
				CUL3_ATCCAGCGTAAGAATAACAG	550	597	613	631	6375	4254	401	278	38653	30625
				CUL3_GAGCATCTCAAACACAACGA	1624	1265	1599	1428	12455	6969	1059	923	166027	104827
				CUL3_GGTGTATTAGGGATCATCTA	281	290	657	567	307	514	435	295	960	341
TADA1	3	9	0.0004	TADA1_AAAGCTTATCGGTTACGAGA	1263	495	270	296	328	478	109	200	4241	1818
				TADA1_AGAACTTAAGCGAGGCCCTG	528	442	431	420	807	1379	241	315	40168	65985
				TADA1_AGCTCATAGACTTCTCACAC	339	127	33	44	446	398	11	24	828	10638
				TADA1_AGTGGGAAGCATCATTGTGT	1236	1047	699	815	2041	1959	342	341	35016	57250
MED23	4	10	0.0004	MED23_AAGGCCATGCGTAGTCACGA	677	751	785	550	1277	577	467	504	8403	1519
				MED23_ACCCATTAAACGTACCTGGG	369	541	600	329	591	356	170	271	1171	322
				MED23_AGGAGCTGAACTCTGTAATG	723	1023	1068	1186	1911	1740	637	1015	25828	20308
				MED23_TACATGAGTTGCTCTAGCCA	725	706	695	547	838	565	446	516	2238	2388
NF1	3	11	0.0004	NF1_CATGAGACCACTGTCTACGT	313	162	18	10	405	403	4	124	491	202
				NF1_CCACCACCTAGAATCGAAAG	579	537	394	161	2472	2661	228	169	3931	3803
				NF1_GAGGAAGCAGATATCCGGTG	546	321	171	114	1512	1692	152	80	1588	2072
				NF1_GGTCCAGTCAGTGAACGTAA	379	74	164	128	500	463	49	39	1008	1147
TAF5L	3	12	0.0011	TAF5L_CGGGACACGTCTACTTGGTG	535	411	1014	897	453	412	587	509	225	193
				TAF5L_GCAGAACGAGGCTGCCCTAG	771	722	580	581	609	417	656	342	1993	4633
				TAF5L_GCGGACCAGTGTACAGCACG	1527	1488	1520	1505	6054	4660	726	989	234073	260784
				TAF5L_TAAGGTGAGGACTTTGCACA	2538	2317	2220	1898	8061	8029	1355	1451	580492	391348
MED15	4	13	0.0011	MED15_GGAATTGGCATGCCTCCTCG	1326	1598	811	817	1203	1298	781	501	5597	3273
				MED15_GTACTCACAAATTTCAGTGG	327	542	199	390	245	576	185	159	295	183
				MED15_GTGACGGCGAGGACAGCATG	2171	1775	1166	1661	2035	2349	1026	1420	12513	13999
				MED15_TGTGTTTAAAGGTCCAGGTG	966	1416	1143	728	1076	1316	619	583	1954	5486
GFM1	4	14	0.0016	GFM1_GAACGAGTCCTTTACTACAC	934	852	760	193	706	450	123	243	6905	1110
				GFM1_GATTCCAGCTGAATTAAGGG	645	355	182	97	213	152	29	38	178	94
				GFM1_GTGACACCATCTATAACACA	802	599	318	288	198	614	63	100	427	152
				GFM1_TTCACAGACAAAGCCAACAG	931	303	348	134	387	319	102	95	501	282
AHR	4	15	0.0016	AHR_ATCGCAAACAAAGCCAACTG	1072	917	489	543	594	828	162	241	1670	2220
				AHR_CTTACTTCGGATATGGGACT	1178	1040	509	601	808	675	250	413	679	490
				AHR_TACCACATCCACTCTAAGCA	1453	718	294	260	782	746	102	105	311	1095
				AHR_TTATAACAGACTACTGTCTG	814	1208	746	880	854	607	602	450	1232	617
MED19	3	16	0.0034	MED19_CACCTGGCAGTTCCCTCATG	478	394	42	51	265	382	31	27	235	512
				MED19_CCTGACTTGTCCGCGCCAGG	600	514	215	205	493	490	261	144	1653	1778
				MED19_GCAGATCAATCATCCCTGGC	553	238	220	145	237	131	32	135	22	90
				MED19_TCCTGGTCCGAAGCCGAGTG	660	817	772	459	2030	1152	259	305	28413	26878
ANAPC11	4	17	0.0038	ANAPC11_GAGCACTGGCCCCACACCAG	1224	858	153	58	406	422	29	84	219	160
				ANAPC11_GATTAAGTGCTGGAACGGCG	1358	948	131	37	532	496	135	136	320	308
				ANAPC11_GCAATGCATGTGGAAGCAGT	1329	616	126	233	169	525	63	203	298	210
				ANAPC11_GTGGCCAACGATGAGAACTG	1475	476	163	80	270	245	100	27	221	224
HIRA	4	18	0.0118	HIRA_ATGTCTGAAACGGCCGCTGG	1104	764	308	445	424	547	162	137	354	301
				HIRA_GAGCCTAGCCATCATGACCG	1210	1610	543	1006	881	833	343	381	696	401
				HIRA_GGGTTGACATGGGACCCTGT	1006	860	567	377	785	705	326	259	374	522
				HIRA_TGTGTGCGGTGGTCAAACAG	1264	1242	332	578	715	1041	137	111	748	774
MAU2	4	19	0.0169	MAU2_AATTTAACATCTTCGAACTG	783	1243	1385	750	1037	733	1109	975	2636	640
				MAU2_ACTCGGCCCCTACACCCAGG	653	412	123	104	193	47	35	38	141	75
				MAU2_AGTTGACAGAGACACAGTAC	858	438	122	79	159	312	40	68	303	135
				MAU2_GATCTCATCATCGTGCAGTG	1528	1044	391	265	400	856	240	324	613	344
MARS2	3	20	0.0205	MARS2_CGCCCTTGTAGAGCAGACCG	702	709	300	473	772	793	45	45	511	619
				MARS2_GGTACCAGTGGAGAATCGCG	306	303	140	70	96	77	54	34	223	133
				MARS2_TTGCCTTAACCGCTATACCG	578	245	110	98	171	327	2	32	109	189
				MARS2_TTTCCTGTATCTCTCGAGAG	607	481	158	239	449	320	78	57	427	327
MED10	3	21	0.0252	MED10_ACTTACTCAAAAACTTCTAA	578	373	109	199	164	249	146	153	73	77
				MED10_CACTCTTTGGTGTAGAGCTG	1307	973	764	335	1006	1088	359	374	3871	2589
				MED10_GGAGAAGTTTGACCACCTAG	611	337	271	293	192	469	344	139	521	716
				MED10_GTGGAGAACATTCGGCAGCT	818	896	407	313	723	862	179	223	1337	1502
PGD	4	22	0.0396	PGD_CAGGAGGGAACAAAGAAGCG	492	455	237	272	505	447	51	51	262	53
				PGD_GGGTACGCCGTATTCCAGGG	841	539	346	177	311	314	54	34	99	253
				PGD_GGTGACATCATCATTGACGG	784	851	101	230	466	581	90	119	350	236
				PGD_TTCGTGAAGATGGTGCACAA	1119	937	320	501	751	945	149	142	318	444
VBP1	4	23	0.0396	VBP1_AGCCAATCACGGAATCCCGG	939	833	589	534	492	647	787	846	1254	1209
				VBP1_CGTGCCTCTTACCACAAACA	850	398	101	139	287	528	38	260	161	235
				VBP1_GAGCCGCCGCCCATTCCCTG	834	464	211	156	492	609	41	69	242	158
				VBP1_GCGCGCTCGCATCCCCAAGA	722	441	207	327	461	350	123	116	187	241
C7orf26	4	24	0.0443	C7orf26_AAAGTGATGAGAATCAACCT	816	942	284	498	452	518	167	138	473	474
				C7orf26_ACATGGCCATTGGATAAGGG	1270	882	528	441	814	782	206	355	300	486
				C7orf26_GTCATAGAGCGCGGTAACGG	326	259	201	149	181	240	54	62	121	341
				C7orf26_TAACCTCACACAGTAAACCA	896	511	178	168	328	284	38	49	242	184
POLR3K	3	25	0.0466	POLR3K_AGTAGAGTCAACATTCTCCC	926	389	262	269	167	185	29	83	168	221
				POLR3K_GCACAACATCACCCGCAAGG	293	110	1	12	44	48	2	1	64	35
				POLR3K_GGCACGTGTTGCAGGCGAAG	1447	853	366	308	385	644	123	195	350	347
				POLR3K_GGGTGATGTTGTGCACGTAG	1491	898	213	141	358	527	32	23	213	293
FOXD3	4	26	0.0466	FOXD3_CAGGTTGCGATAGCCCCGCG	595	571	1401	1199	1265	1379	1212	1343	1562	1085
				FOXD3_CTTCGGCGCTTACAGCCTGG	1349	997	562	622	1631	1197	1062	705	1498	1554
				FOXD3_GAACTCGCAGATGCCGCTCA	741	543	381	304	1003	1389	125	115	1428	1556
				FOXD3_GGCCGGTGCCTATTCGCACC	517	852	818	631	641	724	787	612	1244	494
CAND1	4	27	0.0466	CAND1_AGTCTAGGGCTGGTCAACTG	1045	1362	1048	879	1158	1668	770	517	1128	659
				CAND1_ATAAGGAGTTGCATCAAACG	821	1001	681	482	1007	811	295	250	558	252
				CAND1_GAGATCACCCTTATTGCAGG	879	1151	888	600	619	885	923	648	3620	568
				CAND1_TGGATGCTGTAGTTAGCACA	789	876	801	642	695	959	483	597	4404	3940
PELO	4	28	0.0466	PELO_ACTGCTCCCTCACAAATCCT	343	183	179	73	139	125	117	60	168	150
				PELO_AGAATGAGTATGTCAAGATG	724	618	181	135	282	361	88	34	223	270
				PELO_GGCTTGAGAGTCGAAGTCGA	638	839	474	466	518	650	191	259	426	368
				PELO_TGACTAAGCAGATATGGGCG	525	688	319	344	659	496	71	90	309	400
CYP2R1	3	29	0.0466	CYP2R1_AATCGCCCACCGTAGCACAT	1009	458	492	253	323	404	507	283	317	225
				CYP2R1_CAGGATGCCAATCCATGGAA	767	644	564	335	723	476	285	244	210	8032
				CYP2R1_CTCAATTCCAGATATGGCCG	787	1242	3014	2243	1395	1628	3254	3071	3520	3820
				CYP2R1_TCTTGGAGGCATATCAACTG	865	887	1534	1035	820	679	930	1181	5621	1014
SMARCA4	4	30	0.0466	SMARCA4_CTAGGTATGAAGTAGCTCCG	367	672	284	280	483	378	27	110	189	234
				SMARCA4_GCAGCAGACAGACGAGTACG	618	1195	689	451	772	1017	458	484	1187	5001
				SMARCA4_GGGCGTACGAGTTTGACAAG	600	753	926	531	613	822	390	428	389	436
				SMARCA4_TGAACACCATCATGCAGCTG	1345	837	663	442	982	1608	246	360	3122	2134
CTC1	4	31	0.0466	CTC1_ACTCCAAACCTATCAGCCGT	701	591	672	254	433	428	193	101	411	294
				CTC1_CTCTATGTGAGAGATAACAC	383	572	79	241	132	241	106	69	172	149
				CTC1_GAAGCAGAACGGCGCCACGG	685	908	150	421	627	936	39	54	324	363
				CTC1_TCCCCAACACATAGAAACTG	436	314	73	144	315	258	91	31	226	152
CYC1	3	32	0.0466	CYC1_AAAACCATACCCCAACAGTG	482	331	101	52	188	87	29	19	40	71
				CYC1_AAGGCCAGACTTCGACGACA	495	431	87	242	164	219	122	86	201	316
				CYC1_AGCTATCCGTGGTCTCACCG	706	382	228	13	337	286	46	29	339	211
				CYC1_GGTGGGCGTGTGCTACACGG	840	580	191	233	338	242	31	33	147	110
MRPS12	4	33	0.0473	MRPS12_ATCGCAAGTGCTGTCGAGTG	1185	1262	846	494	675	757	313	317	819	519
				MRPS12_CTCAACACGTCCCTAACTTG	667	446	131	196	221	480	52	67	194	289
				MRPS12_GCTTGCGGGTAAACGTGCAC	666	374	137	190	250	327	106	125	174	180
				MRPS12_GGATGAAGCAGACGGCCTCG	810	1011	500	382	562	482	258	210	509	580
